# Supplementary material for: Anxiety and depressive disorders are associated with delusional-like experiences: a replication study based on a National Survey of Mental Health and Wellbeing
Source: PubMed Central journal article supplement — BMJ Open. 2012 May 30;2(3):e001001. doi: 10.1136/bmjopen-2012-001001 (PMC3367143; doi:10.1136/bmjopen-2012-001001), 2012-05-30
Supplement: bmjopen-2012-001001-s1.pdf [file bmjopen-2012-001001-s1.pdf]

## Appendix 1 CIDI Screen items and Probes for delusional-like experiences<sup>1</sup> (n=10,554<sup>2</sup>)

---

### *Item G1:*

In the past 12 months, have you felt that your thoughts were being directly interfered with or controlled by another person?

*If yes, G1A:*

*Did it come about in a way that many people would find hard to believe, for instance, through telepathy?*

### *Item G2:*

In the past 12 months, have you had a feeling that people were too interested in you?

*If yes, G2A:*

*In the past 12 months, have you had a feeling that things were arranged so as to have a special meaning for you, or even that harm might come to you?*

### *Item G3:*

Do you have any special powers that most people lack?

*If yes, G3A:*

*Do you belong to a group of people who also have these powers?*

### *Item G4:*

Has a doctor ever told you that you may have schizophrenia?

---

<sup>1</sup>Screen items (lifetime) with answer (Yes/No): 'Any screen' items required 'Yes' answers to all three questions G1, G2 & G3.

#Probe items (lifetime) with answer (Yes/No): 'Any probe' items required 'Yes' answers to G1A and G2A, and 'No' answer to G3A.

<sup>2</sup>sample excludes item G4 (*Has a doctor ever told you that you may have schizophrenia?*) (n=87)
