# Supplementary material for: Anxiety and depressive disorders are associated with delusional-like experiences: a replication study based on a National Survey of Mental Health and Wellbeing
Source: PubMed Central journal article supplement — BMJ Open. 2012 May 30;2(3):e001001. doi: 10.1136/bmjopen-2012-001001 (PMC3367143; doi:10.1136/bmjopen-2012-001001), 2012-05-30
Supplement: bmjopen-2012-001001.draft_revisions.pdf [file bmjopen-2012-001001.draft_revisions.pdf]

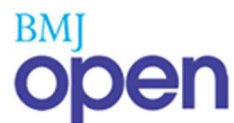

**Anxiety and depressive disorders are associated with delusional-like experiences: a replication study based on a national mental health survey**

|                                 |                                                                                                                                                                                                                                                                                                                          |
|---------------------------------|--------------------------------------------------------------------------------------------------------------------------------------------------------------------------------------------------------------------------------------------------------------------------------------------------------------------------|
| Journal:                        | <i>BMJ Open</i>                                                                                                                                                                                                                                                                                                          |
| Manuscript ID:                  | bmjopen-2012-001001                                                                                                                                                                                                                                                                                                      |
| Article Type:                   | Research                                                                                                                                                                                                                                                                                                                 |
| Date Submitted by the Author:   | 08-Feb-2012                                                                                                                                                                                                                                                                                                              |
| Complete List of Authors:       | Saha, Sukanta; The Park Centre for Mental Health, Queensland Centre for Mental Health Research<br>Scott, James; The Park Centre for Mental Health, Queensland Centre for Mental Health Research<br>Varghese, Daniel; Princess Alexandra Hospital,<br>McGrath, John; University of Queensland, Queensland Brain Institute |
| <b>Primary Subject Heading</b>: | Mental health                                                                                                                                                                                                                                                                                                            |
| Secondary Subject Heading:      | Epidemiology, Public health                                                                                                                                                                                                                                                                                              |
| Keywords:                       | EPIDEMIOLOGY, MENTAL HEALTH, Adult psychiatry < PSYCHIATRY, Schizophrenia & psychotic disorders < PSYCHIATRY                                                                                                                                                                                                             |
|                                 |                                                                                                                                                                                                                                                                                                                          |

SCHOLARONE™  
Manuscripts

1  
2  
3 *Abstract: 293 words*

4 *Main text: 1922 (excluding tables and references)*

5 *Tables 3*

6 *Appendices: 1*

7 *Key words: Delusional-like experiences, Anxiety disorders, Depressive disorders*

8  
9  
10  
11  
12 Anxiety and depressive disorders are associated with delusional-like  
13 experiences: a replication study based on a national mental health survey  
14  
15

16  
17 Sukanta Saha\* <sup>1</sup>

18  
19 James Scott <sup>1,2,3,4</sup>

20  
21 Daniel Varghese<sup>5</sup>

22  
23 John McGrath <sup>1,4,6</sup>

- 24  
25  
26  
27 1. Queensland Centre for Mental Health Research, The Park Centre for Mental  
28 Health, Wacol, QLD 4076, Australia  
29  
30 2. Metro North Mental Health, Royal Brisbane and Women's Hospital, Brisbane,  
31 QLD, Australia  
32  
33 3. The University of Queensland Centre for Clinical Research, Brisbane, QLD,  
34 Australia  
35  
36 4. Discipline of Psychiatry, University of Queensland, St Lucia QLD, Australia  
37  
38 5. Princess Alexandra Hospital, Woolloongabba, QLD 4102 Australia  
39  
40 6. Queensland Brain Institute, University of Queensland, St Lucia, QLD, Australia  
41  
42  
43  
44

45 **Corresponding author:**

46  
47 Dr Sukanta Saha

48  
49 Queensland Centre for Mental Health Research,  
50 The Park Centre for Mental Health,  
51 Wacol, Queensland, 4076, Australia.  
52 sukanta\_saha@qcmhr.uq.edu.au  
53 Phone: +61 7 3271 8689  
54 Fax: +61 7 3271 8698  
55  
56  
57  
58  
59  
60

## Abstract

### Objectives

There is growing evidence that delusional-like experiences (DLE) are associated with common mental disorders. In particular, a National Mental Health survey conducted in Australia during 2007 reported an association between DLE and both anxiety disorder and major depressive disorder (MDD). However, the previous study did not examine this association with respect to subtypes of anxiety disorder nor with severity of MDD. The aim of this study was to examine the associations between DLE, and anxiety disorder and MDD in more detail based on an independent population sample.

### Design

Cross-sectional study

### Setting

Subjects were drawn from the Australian Survey of Mental Health and Wellbeing 1997 using a stratified multistage area sampling of persons living in private dwellings in all States and Territories of Australia.

### Participants

Approximately 13,600 private dwellings were initially selected with one person aged 18 years or over from each dwelling invited to participate. In total, 10,641 individuals participated in the survey.

### Primary and secondary outcome measures

The Composite International Diagnostic Interview (CIDI) was used to identify individuals with DLE and DSM IV lifetime diagnoses of anxiety disorders and MDD. The influence of various anxiety disorders and MDD on DLE was assessed with logistic regression.

### Results

1  
2  
3 Having a lifetime diagnosis of either any anxiety disorder or MDD was significantly  
4 associated with the endorsement of DLE. The association was found for each of the  
5 main anxiety disorders when examined separately. There was a dose response  
6 relationship between increasing severity of MDD and higher odds of DLE endorsement.  
7  
8  
9

## 10 11 **Conclusions**

12  
13  
14 Delusional-like experiences are associated with a wide range of anxiety disorders and  
15 are more prevalent in those with MDD. Understanding the relationship between DLE,  
16 anxiety disorders and depression may provide insights into shared pathways that  
17 underpin both psychotic disorders and common mental disorders.  
18  
19  
20  
21  
22  
23  
24  
25  
26  
27  
28  
29  
30  
31  
32  
33  
34  
35  
36  
37  
38  
39  
40  
41  
42  
43  
44  
45  
46  
47  
48  
49  
50  
51  
52  
53  
54  
55  
56  
57  
58  
59  
60

## INTRODUCTION

There is now robust evidence indicating that hallucinations and delusional-like experiences (DLE) are common in the general population. In recent years the field has focused on the demographic and clinical correlates of hallucinations and DLE.<sup>1-9</sup> Of particular interest, there is a growing body of evidence reporting an association between DLE endorsement and common mental disorders such as anxiety disorders and major depressive disorder (MDD). For example, panic attacks during adolescence were significantly associated with increased levels of DLE among young adults.<sup>10</sup> In the NEMESIS study, subjects with obsessive compulsive symptoms were more likely to develop incident psychotic symptoms three years later.<sup>11</sup> Conversely, a Swiss-based cohort reported that young adults with psychotic-like experiences were significantly more likely to later develop common mental disorders such as anxiety disorders and MDD.<sup>12</sup> A German community-based study found an association between social phobia, social anxiety and DLE.<sup>13</sup> While a US primary-care based sample reported that those who reported psychotic-like experiences were more likely to have generalized anxiety disorders and panic disorders.<sup>14</sup>

Trauma exposure with or without post-traumatic stress disorder has been associated with DLE.<sup>7</sup> Two Australian studies<sup>9,15,16</sup> have found significant associations between DLE, and broadly-defined anxiety disorders, however to date these studies did not report on subtypes of anxiety disorders. In light of the evidence linking DLE with a wide range of different types of anxiety disorders, the evidence suggests that DLE are nonspecifically associated with anxiety disorders.

1  
2  
3 With respect to depression, several studies have found that individuals with depression  
4 are significantly more likely to endorse DLE.<sup>9,15-17</sup> Studies also show that DLE requiring  
5 clinical care were progressively more likely to occur with greater levels of affective  
6 dysregulation (depressive symptoms and hypo-manic symptoms).<sup>18</sup> Importantly, there  
7 was a significant association between severity of depressive symptoms and persistence  
8 of psychotic symptoms.  
9

10  
11 Based on an independent national survey, we had the opportunity to replicate our  
12 previous findings with respect to the association between DLE and (a) broadly defined  
13 anxiety disorders, and (b) MDD.<sup>9</sup> In addition, we were able to explore the association  
14 between DLE and a range of specific anxiety disorders. Furthermore, we were able to  
15 examine if severity of major depressive disorder influenced the risk of endorsement of  
16 DLE.  
17  
18  
19  
20  
21  
22  
23  
24  
25  
26  
27  
28  
29  
30  
31  
32  
33  
34  
35  
36  
37  
38

## 39 **METHODS**

### 40 **Participants**

41  
42 The data were drawn from the 1997 National Survey of Mental Health and Wellbeing  
43 conducted in Australia by the Australian Bureau of Statistics (ABS) from a  
44 representative sample (random stratified multistage area sampling) of persons living in  
45 private dwellings in all States and Territories of Australia. Details of the survey  
46 methodology were published elsewhere.<sup>19</sup> In brief, approximately 13,600 private  
47  
48  
49  
50  
51  
52  
53  
54  
55  
56  
57  
58  
59  
60

1  
2  
3 dwellings were initially selected with one person aged 18 years or over from each  
4 dwelling invited to participate. In total, 10,641 individuals participated in the survey,  
5  
6 representing a response rate of 78%. Interviews were carried out by trained interviewers  
7  
8 from the ABS, a statutory body responsible for conducting such surveys using ethical  
9  
10 protocols that include written informed consent.  
11  
12  
13

## 14 15 16 17 **Assessment of delusional-like experiences and DSM-IV diagnoses** 18 19

20  
21  
22 Mental disorders were assessed by a modified version of the Composite International  
23  
24 Diagnostic Interview (CIDI)<sup>20</sup> which yielded diagnoses of DSM-IV disorders. Details of  
25  
26 the DLE are given in Appendix 1. Briefly, within the CIDI there are three items related to  
27  
28 identifying individuals who may be psychotic (*G Items*: “screening items”) each followed  
29  
30 by a probe item. The items covered the following features of psychotic disorders:  
31  
32 delusions of control, thought interference and passivity (Question 1 and 1a); delusions  
33  
34 of reference or persecution (Question 2 and 2a); and grandiose delusions (Question 3  
35  
36 and 3a). There was no item to assess hallucinations.  
37  
38  
39  
40  
41  
42

43  
44 Based on CIDI-derived DSM-IV criteria, we identified subjects who had lifetime  
45  
46 diagnoses of: (a) an anxiety disorder, (b) major depressive disorder. Anxiety disorders  
47  
48 included panic disorder with or without agoraphobia, social phobia, generalised anxiety  
49  
50 disorder (GAD), obsessive compulsive disorder (OCD), and agoraphobia without panic  
51  
52 disorder. MDD was classified as 'mild', 'moderate' or 'severe' without psychotic  
53  
54 features.  
55  
56  
57  
58  
59  
60

1  
2  
3 To ascertain trauma exposure, the CIDI elicits responses from 10 questions pertaining  
4 to past exposure to traumatic events. Details of the trauma variables have been  
5 published previously by our group.<sup>7</sup>  
6  
7  
8  
9

10  
11  
12 In keeping with our previous analyses<sup>1-9</sup> individuals who screened positively for  
13 schizophrenia (i.e. respondents who reported 'Yes' to the item "*Had been told at any*  
14 *time by a psychiatrist that they had schizophrenia*") were excluded from the analyses  
15 (n=87) leaving a total of 10,554 subjects for this study.  
16  
17  
18  
19  
20  
21

## 22 23 24 **Statistical analysis** 25

26  
27  
28 To examine the association between delusional-like experiences, and anxiety disorders  
29 and MDD, logistic models were fitted to the data while adjusting for various confounding  
30 factors. Because sex and age are associated with DLE,<sup>16,21</sup> we included these as  
31 covariates in the main analyses. In keeping with our previous studies, we included a  
32 range of CIDI-derived, potential confounding variables in Model 2. These include  
33 substance misuse,<sup>22</sup> marital status, and migrant status,<sup>23</sup> educational status,  
34 employment status and family income, and trauma exposure.<sup>2,4,6,7,23</sup> As co-morbidity  
35 frequently occurs between anxiety disorders and MDD, we also adjusted for the  
36 presence of the other psychiatric diagnoses under investigation (i.e. the association  
37 between MDD and DLE was adjusted for the presence of anxiety disorders, and the  
38 association between anxiety disorders and DLE was adjusted for the presence of Major  
39 Depressive Disorder).  
40  
41  
42  
43  
44  
45  
46  
47  
48  
49  
50  
51  
52  
53  
54  
55  
56  
57  
58  
59  
60



1  
2  
3 For secondary analyses, we repeated the main analyses excluding the second screen  
4 items (“Have you ever had a feeling that people were too interested in you?”) because  
5  
6 clinical experience suggests that this is a common experience in social anxiety.  
7  
8  
9

10  
11  
12 The sample was weighted to adjust for differential probabilities of selection within  
13 households, over-sampling of population subgroups and non-response to match census  
14 population distribution on a number of geographic and socio-demographic variables.  
15  
16 The initial weights were calibrated against known population estimates. Replicate  
17 weight variables were developed using the Jack-knife procedure of replication (i.e., the  
18 analysis was repeated after one subject was dropped and then the standard error was  
19 derived from the distribution of results from all “minus one” resamples).<sup>24</sup> Analyses  
20 were performed using Proc *Surveylogistic*<sup>25</sup> which is designed to analyse complex  
21 survey sample using SAS (version 9.2; Cary, NC: SAS Institute). Chi-square test-for-  
22 linear trend was used to assess dose-response relationships between the exposure  
23 variables and DLE.  
24  
25  
26  
27  
28  
29  
30  
31  
32  
33  
34  
35  
36  
37  
38  
39

## 40 RESULTS

41  
42  
43  
44  
45 Of the 10 554 subjects surveyed, 11.6% (n=1276) positively endorsed one or more DLE  
46 items (Table 1). There was a weak effect of females being more likely to endorse DLE  
47 than males (Odd Ratio (OR) 1.05; 95% Confidence Intervals (CI) 1.04-1.05). The  
48 prevalence of lifetime diagnosis of any anxiety disorder was 4.9% (n=580), and the  
49 prevalence of lifetime depressive disorders was 5.3% (n=651).  
50  
51  
52  
53  
54  
55  
56  
57  
58  
59  
60

1  
2  
3  
4  
5  
6  
7  
8  
9  
10  
11  
12  
13  
14  
15  
16  
17  
18  
19  
20  
21  
22  
23  
24  
25  
26  
27  
28  
29  
30  
31  
32  
33  
34  
35  
36  
37  
38  
39  
40  
41  
42  
43  
44  
45  
46  
47  
48  
49  
50  
51  
52  
53  
54  
55  
56  
57  
58  
59  
60

Insert Table 1 about here

As predicted, the main analyses showed that those with any anxiety disorder and participants who had lifetime diagnosis of MDD were significantly more likely to endorse delusional-like experiences. Those with anxiety disorders were two to three times more likely to endorse both DLE screen and probe items (Table 2), and those with a diagnosis of major depressive disorder were also two to three times more likely to endorse DLE screen and probe items.

Insert Table 2 about here

Concerning the subtypes of anxiety disorders, each disorder was significantly associated with DLE screen items, and there were no marked differences in the effect sizes between the different disorders (Table 3). There was a dose response relationship between the severity of the MDD and DLE in which severe depression showed twice the odds of endorsement of DLE screen items compared with a diagnosis of mild major depressive disorder with a significant linear trend ( $X^2=44.19$ ,  $p<.0001$ ). Broadly similar (but less precise) associations were also found for probe items.

Insert Table 3 about here

1  
2  
3 In the secondary analysis, when we conducted the models using two DLE items (G1 &  
4 G3), the pattern of significant association for major anxiety and depressive disorders  
5 remained unchanged (data not shown).  
6  
7  
8  
9

## 10 11 12 13 **DISCUSSION** 14

15  
16  
17  
18 Individuals with a life time diagnosis of major depressive disorder or an anxiety disorder  
19 were significantly more likely to report DLE compared to those without these disorders.  
20  
21 We found that each subtype of anxiety disorder was associated with DLE, and there  
22 were no marked differences in the effect sizes for these associations (the confidence  
23 intervals around these associations overlapped). Based on this same sample, we have  
24 previously demonstrated with trauma exposure with Post-traumatic Stress Disorder is  
25 associated with DLE.<sup>7</sup> Our new findings add additional weight to the conclusion that a  
26 range of disorders with prominent anxiety symptoms are associated with DLE.  
27  
28  
29  
30  
31  
32  
33  
34  
35  
36  
37  
38

39 As predicted, there was also a dose response relationship between severity of MDD  
40 and DLE. All associations remained significant when adjusted for associated co-  
41 morbidity with anxiety, alcohol and illicit substance misuse and any traumatic life events  
42 indicating that the associations are independent of co-morbid psychiatric illnesses, and  
43 selected environmental and demographic risk factors. Similar associations were  
44 previously reported from another (independent) Australian population survey,<sup>9</sup> and more  
45 broadly with other population samples.<sup>15-17</sup>  
46  
47  
48  
49  
50  
51  
52  
53  
54  
55  
56  
57  
58  
59  
60

1  
2  
3 The mechanisms linking DLE with anxiety disorder and MDD remain unclear. However,  
4  
5 there is evidence to suggest that shared familial factors may contribute to these  
6  
7 findings. Based on a large, population-based sample (n = 8841), we found that  
8  
9 regardless of the presence of a mental illness experienced by the respondents, those  
10  
11 who reported a family history of depressive disorder in a first-degree relative had an  
12  
13 increased odds of endorsing DLE (Adjusted odds ratio 1.53; 95% CI 1.19-1.96). With  
14  
15 respect to the presence of a first degree relative with an anxiety disorder and DLE,  
16  
17 similar odds were identified (Adjusted OR 1.59; 95%CI 1.23-2.05). Thus, the presence  
18  
19 of an anxiety disorder or MDD in respondents, or the presence of a family history of  
20  
21 either disorder in otherwise well individuals, are both associated with DLE. As the  
22  
23 genetic architecture of anxiety and mood disorders is unravelled, it will be of interest to  
24  
25 explore if common polymorphisms linked to these disorders are also associated with  
26  
27 DLE.  
28  
29  
30  
31  
32  
33  
34  
35

36 With respect to more proximal mechanisms, it is reasonable to presume that anxiety  
37  
38 disorders or major depressive disorder lead to heightened vulnerability for the onset of  
39  
40 delusional-like experiences. While the causal pathway is unknown, it may stem through  
41  
42 destabilizing effects of severe anxiety or depression on emotional and cognitive  
43  
44 functioning<sup>26,27</sup> which may lead to aberrant assignment of salience and delusional  
45  
46 experiences.<sup>28</sup> However, it is also possible that acute psychotic episodes can precede  
47  
48 and predict anxiety or depressive disorders.<sup>11</sup>  
49  
50  
51  
52  
53

54 The study has several limitations. Importantly, this study was cross-sectional and  
55  
56 therefore, it was not possible to establish the direction of causality between anxiety and  
57  
58  
59  
60

1  
2  
3 depressive disorder, and DLE. While the CIDI has some information about the age of  
4  
5 onset for some diagnoses, we do not have information on the age of onset of the DLE.  
6  
7 While the interviewers were trained, the diagnoses of MDD and anxiety disorders were  
8  
9 not validated by clinical assessment. However, the CIDI is generally regarded as having  
10  
11 good psychometric properties for common mental disorders.<sup>29</sup> Comorbidity between  
12  
13 anxiety disorders and MDD is common, and while we included adjustments in the our  
14  
15 models to attempt to account for this feature, the complex nature of the relationships  
16  
17 between DLE, MDD and anxiety disorders could reduce the accuracy of the odds  
18  
19 ratios.<sup>30</sup> We had a small number of screen and probe items to measure delusional-like  
20  
21 experiences and there were no items for hallucinations. However, previous general  
22  
23 population studies have found a strong association between the presence of DLE and  
24  
25 hallucination.<sup>23,31-33</sup>  
26  
27  
28  
29  
30  
31  
32  
33

34 Clinicians treating mild anxiety and mood disorders may not routinely screen for  
35  
36 psychotic-like experiences. However, there is now robust and consistent evidence  
37  
38 indicating that those with anxiety disorders and MDD have an increased risk of DLE. In  
39  
40 light of the association between DLE and suicidal ideation/behaviour,<sup>3</sup> the presence of  
41  
42 DLE has important clinical implications. Understanding the relationship and time course  
43  
44 between DLE, anxiety and depression may provide insights into shared pathways that  
45  
46 underpin both psychotic disorders and common mental disorders.  
47  
48  
49  
50  
51  
52  
53  
54  
55  
56  
57  
58  
59  
60

1  
2  
3 **Competing interest** None  
4  
5  
6

7  
8 **Funding** This research received no specific grant from any funding agency in the  
9 public, commercial or not-for-profit sectors.  
10  
11

12  
13 **Contributors** JM, SS and JS have directly participated in the planning and execution  
14 of the study. SS analysed the data. All authors have critically read, and approved the  
15 final version submitted.  
16  
17  
18

19  
20  
21 **Provenance and peer review** Not commissioned; externally peer reviewed  
22  
23

24  
25 **Data sharing statement** The data is available from the Australian Bureau of  
26 Statistics  
27  
28  
29  
30  
31  
32  
33  
34  
35  
36  
37  
38  
39  
40  
41  
42  
43  
44  
45  
46  
47  
48  
49  
50  
51  
52  
53  
54  
55  
56  
57  
58  
59  
60

## REFERENCES

1. Saha S, Scott J, Varghese D, McGrath J. The association between physical health and delusional-like experiences: a general population study. *PLoS One* 2011; 6: e18566.
2. Saha S, Scott J, Varghese D, McGrath J. The association between socio-economic disadvantage and delusion-like experiences: a nationwide population-based study. *European Psychiatry in press (accepted Dec 12, 2011)* 2011.
3. Saha S, Scott JG, Johnston AK, Slade TN, Varghese D, et al. The association between delusional-like experiences and suicidal thoughts and behaviour. *Schizophr Res* 2011; 132: 197-202.
4. Saha S, Scott JG, Varghese D, Degenhardt L, Slade T, et al. The association between delusional-like experiences, and tobacco, alcohol or cannabis use: a nationwide population-based survey. *BMC Psychiatry* 2011; 11: 202.
5. Saha S, Scott JG, Varghese D, McGrath JJ. The association between general psychological distress and delusional-like experiences: a large population-based study. *Schizophr Res* 2011; 127: 246-251.
6. Saha S, Varghese D, Slade T, Degenhardt L, Mills K, et al. The association between trauma and delusional-like experiences. *Psychiatry Res* 2011; 189: 259-264.
7. Scott J, Chant D, Andrews G, Martin G, McGrath J. Association between trauma exposure and delusional experiences in a large community-based sample. *Br J Psychiatry* 2007; 190: 339-343.

- 1  
2  
3 8. Scott J, Chant D, Andrews G, McGrath J. Psychotic-like experiences in the general  
4  
5 community: the correlates of CIDI psychosis screen items in an Australian  
6  
7 sample. *Psychol Med* 2006; 36: 231-238.  
8  
9
- 10  
11 9. Varghese D, Saha S, Scott JD, Chan RC, McGrath JJ. The association between  
12  
13 family history of mental disorder and delusional-like experiences: a general  
14  
15 population study. *Am J Med Genet B Neuropsychiatr Genet* 2011; 156B: 478-  
16  
17 483.  
18  
19
- 20  
21 10. Goodwin RD, Fergusson DM, Horwood LJ. Panic attacks and psychoticism. *Am J*  
22  
23 *Psychiatry* 2004; 161: 88-92.  
24  
25
- 26  
27 11. van Dael F, van Os J, de Graaf R, ten Have M, Krabbendam L, et al. Can  
28  
29 obsessions drive you mad? Longitudinal evidence that obsessive-compulsive  
30  
31 symptoms worsen the outcome of early psychotic experiences. *Acta Psychiatr*  
32  
33 *Scand* 2011; 123: 136-146.  
34  
35
- 36  
37 12. Rössler W, Hengartner MP, Ajdacic-Gross V, Haker H, Gamma A, et al. Sub-clinical  
38  
39 psychosis symptoms in young adults are risk factors for subsequent common  
40  
41 mental disorders. *Schizophr Res* 2011; 131: 18-23.  
42  
43
- 44  
45 13. Schutters SI, Dominguez MD, Knappe S, Lieb R, van Os J, et al. The association  
46  
47 between social phobia, social anxiety cognitions and paranoid symptoms. *Acta*  
48  
49 *Psychiatr Scand* 2011.  
50
- 51  
52 14. Olfson M, Lewis-Fernandez R, Weissman MM, Feder A, Gameroff MJ, et al.  
53  
54 Psychotic symptoms in an urban general medicine practice. *Am J Psychiatry*  
55  
56 2002; 159: 1412-1419.  
57  
58  
59  
60



- 1  
2  
3  
4  
5  
6  
7  
8  
9  
10  
11  
12  
13  
14  
15  
16  
17  
18  
19  
20  
21  
22  
23  
24  
25  
26  
27  
28  
29  
30  
31  
32  
33  
34  
35  
36  
37  
38  
39  
40  
41  
42  
43  
44  
45  
46  
47  
48  
49  
50  
51  
52  
53  
54  
55  
56  
57  
58  
59  
60
15. Yung AR, Buckby JA, Cosgrave EM, Killackey EJ, Baker K, et al. Association between psychotic experiences and depression in a clinical sample over 6 months. *Schizophr Res* 2007; 91: 246-253.
  16. Varghese D, Scott J, Welham J, Bor W, Najman J, et al. Psychotic-like experiences in major depression and anxiety disorders: a population-based survey in young adults. *Schizophr Bull* 2011; 37: 389-393.
  17. Armando M, Nelson B, Yung AR, Ross M, Birchwood M, et al. Psychotic-like experiences and correlation with distress and depressive symptoms in a community sample of adolescents and young adults. *Schizophr Res* 2010; 119: 258-265.
  18. van Rossum I, Dominguez MG, Lieb R, Wittchen HU, van Os J. Affective dysregulation and relativity distortion: a 10-year prospective study of their association and clinical relevance. *Schizophr Bull* 2011; 37: 561-571.
  19. Andrews G, Henderson S, Hall W. Prevalence, comorbidity, disability and service utilisation. Overview of the Australian National Mental Health Survey. *Br J Psychiatry* 2001; 178: 145-153.
  20. WHO. Composite International Diagnostic Interview- Version 1.1: World Health Organisation: Geneva 1993.
  21. Varghese D, Scott J, McGrath J. Correlates of delusion-like experiences in a non-psychotic community sample. *Aust N Z J Psychiatry* 2008; 42: 505-508.

- 1  
2  
3 22. Degenhardt L, Hall W. The association between psychosis and problematical drug  
4 use among Australian adults: findings from the National Survey of Mental Health  
5 and Well-Being. *Psychological Medicine* 2001; 31: 659-668.  
6  
7  
8  
9  
10  
11 23. Scott J, Welham J, Martin G, Bor W, Najman J, et al. Demographic correlates of  
12 psychotic-like experiences in young Australian adults. *Acta Psychiatr Scand*  
13 2008; 118: 230-237.  
14  
15  
16  
17  
18 24. Rust KF, Rao JN. Variance estimation for complex surveys using replication  
19 techniques. *Stat Methods Med Res* 1996; 5: 283-310.  
20  
21  
22  
23 25. An AB Performing logistic regression on survey data with the new  
24 SURVEYLOGISTIC procedure. Proceedings of the Twenty-Seven Annual SAS  
25 Users Group International Conference. Paper 258 ed:  
26 <http://www2.sas.com/proceedings/sugi27/p258-27.pdf>. 2004.  
27  
28  
29  
30  
31  
32  
33 26. Austin MP, Mitchell P, Goodwin GM. Cognitive deficits in depression: possible  
34 implications for functional neuropathology. *Br J Psychiatry* 2001; 178: 200-206.  
35  
36  
37  
38 27. Murrough JW, Iacoviello B, Neumeister A, Charney DS, Iosifescu DV. Cognitive  
39 dysfunction in depression: Neurocircuitry and new therapeutic strategies.  
40  
41  
42  
43  
44 *Neurobiol Learn Mem* 2011.  
45  
46  
47 28. van Os J, Tamminga C. Deconstructing psychosis. *Schizophr Bull* 2007; 33: 861-  
48 862.  
49  
50  
51  
52 29. Andrews G, Peters L. The psychometric properties of the Composite International  
53 Diagnostic Interview. *Soc Psychiatry Psychiatr Epidemiol* 1998; 33: 80-88.  
54  
55  
56  
57  
58  
59  
60

- 1  
2  
3  
4  
5  
6  
7  
8  
9  
10  
11  
12  
13  
14  
15  
16  
17  
18  
19  
20  
21  
22  
23  
24  
25  
26  
27  
28  
29  
30  
31  
32  
33  
34  
35  
36  
37  
38  
39  
40  
41  
42  
43  
44  
45  
46  
47  
48  
49  
50  
51  
52  
53  
54  
55  
56  
57  
58  
59  
60
30. Hernan MA, Hernandez-Diaz S, Werler MM, Mitchell AA. Causal knowledge as a prerequisite for confounding evaluation: an application to birth defects epidemiology. *Am J Epidemiol* 2002; 155: 176-184.
31. Hanssen MS, Bijl RV, Vollebergh W, van Os J. Self-reported psychotic experiences in the general population: a valid screening tool for DSM-III-R psychotic disorders? *Acta Psychiatr Scand* 2003; 107: 369-377.
32. Lincoln TM, Peter N, Schafer M, Moritz S. Impact of stress on paranoia: an experimental investigation of moderators and mediators. *Psychol Med* 2008: 1-11.
33. Scott J, Martin G, Welham J, Bor W, Najman J, et al. Psychopathology during childhood and adolescence predicts delusional-like experiences in adults: a 21-year birth cohort study. *Am J Psychiatry* 2009; 166: 567-574.

**Table 1. Descriptive statistics of delusional-like experiences (Screen items), anxiety disorder and major depressive disorder (n=10,554)**

| Exposure                                             | Sample<br>n (%) | Delusional-like experiences endorsement |              |
|------------------------------------------------------|-----------------|-----------------------------------------|--------------|
|                                                      |                 | No (%)                                  | Yes (%)      |
| Total sample                                         | 10,554 (100.00) | 9278 (88.44)                            | 1276 (11.56) |
| Anxiety and depressive disorders                     |                 |                                         |              |
| No Anxiety disorders                                 | 9974 (95.13)    | 8900 (85.16)                            | 1074 (9.97)  |
| <sup>1</sup> Any Anxiety disorders: lifetime         | 580 (4.87)      | 378 (4.29)                              | 202 (16.88)  |
| No Major depressive disorder                         | 9903 (94.66)    | 8834 (84.76)                            | 1069 (9.89)  |
| <sup>2</sup> Any Major depressive disorder: lifetime | 651 (5.34)      | 444 (4.77)                              | 207 (16.78)  |

Major depressive disorder based on CIDI DSM diagnosis

<sup>2</sup>Anxiety disorders based on CIDI DSM diagnosis

**Table 2. Association between delusional-like experiences, and anxiety disorders and major depressive disorder (n=10,554)**

| Disorders                                        | Delusional-like experiences            |                                        |                                        |                                        |
|--------------------------------------------------|----------------------------------------|----------------------------------------|----------------------------------------|----------------------------------------|
|                                                  | Screen items                           |                                        | Probe items                            |                                        |
|                                                  | Model 1 <sup>1</sup>                   | Model 2 <sup>2</sup>                   | Model 1 <sup>1</sup>                   | Model 2 <sup>2</sup>                   |
|                                                  | OR <sup>3</sup> (95% CI <sup>4</sup> ) |
| Anxiety disorders: lifetime <sup>@</sup>         | <b>3.88</b><br>(2.92, 5.16)*           | <b>2.43</b><br>(1.91, 3.09)*           | <b>3.36</b><br>(1.86, 6.05)*           | <b>2.12</b><br>(1.27, 3.54)*           |
| Major depressive disorder: Lifetime <sup>#</sup> | <b>3.63</b><br>(2.75, 4.79)*           | <b>2.17</b><br>(1.65, 2.86)*           | <b>2.91</b><br>(1.84, 4.59)*           | <b>1.63</b><br>(1.10, 2.42)*           |

<sup>1</sup>Model 1= Adjusted for age and sex

<sup>2</sup>Model 2= Adjusted for age, sex, marital status, migrant status, income, employment status, educational status, any alcohol use/dependence disorders, any drug use/dependence disorders, and any traumatic life events (in Model 2 anxiety disorders were adjusted for major depressive disorder and vice versa)

<sup>@</sup>#Anxiety and depressive disorders were based on CIDI DSM diagnosis

<sup>3</sup>OR=Odds ratio; <sup>4</sup>CI= Confidence Interval

\*significance:  $p < 0.001$

**Table 3. Association between delusional-like experiences, and different individual exposure to lifetime anxiety disorders, and major depressive disorder (n=10,554)**

|                                         | Delusional-like experiences     |                                                                |                                                                |                                                                |                                                                |
|-----------------------------------------|---------------------------------|----------------------------------------------------------------|----------------------------------------------------------------|----------------------------------------------------------------|----------------------------------------------------------------|
|                                         |                                 | Screen items                                                   | Probe items                                                    |                                                                |                                                                |
|                                         | Number<br>(%, SE <sup>1</sup> ) | Model 1 <sup>2</sup><br>OR <sup>4</sup> (95% CI <sup>5</sup> ) | Model 2 <sup>3</sup><br>OR <sup>4</sup> (95% CI <sup>5</sup> ) | Model 1 <sup>2</sup><br>OR <sup>4</sup> (95% CI <sup>5</sup> ) | Model 2 <sup>3</sup><br>OR <sup>4</sup> (95% CI <sup>5</sup> ) |
| <b>Anxiety disorders</b>                |                                 |                                                                |                                                                |                                                                |                                                                |
| Panic disorder with/without agoraphobia | 124 (1.02, 0.12)                | <b>4.56 (2.51, 8.33)*</b>                                      | <b>2.40 (1.03, 5.63)*</b>                                      | <b>2.55 (1.13, 5.78)*</b>                                      | 1.54 (0.77, 3.08)                                              |
| General anxiety                         | 311 (2.57, 0.23)                | <b>3.69 (2.57, 5.29)*</b>                                      | <b>2.09 (1.50, 2.93)*</b>                                      | <b>3.05 (1.41, 6.58)*</b>                                      | 1.77 (0.89, 3.51)                                              |
| Obsessive compulsive disorder           | 77 (0.69, 0.12)                 | <b>5.19 (2.69, 10.03)*</b>                                     | <b>2.97 (1.50, 5.88)*</b>                                      | <b>4.60 (1.81, 11.74)*</b>                                     | <b>2.68 (1.05, 6.84)*</b>                                      |
| Agoraphobia without panic disorder      | 60 (0.49, 0.06)                 | <b>5.18 (2.72, 9.85)*</b>                                      | <b>3.49 (1.95, 6.28)*</b>                                      | <b>7.02 (3.73, 13.19)*</b>                                     | <b>4.65 (1.98, 10.89)*</b>                                     |
| Social phobia                           | 160 (1.35, 0.14)                | <b>4.14 (2.81, 6.11)*</b>                                      | <b>2.29 (1.63, 3.24)*</b>                                      | <b>4.15 (1.93, 8.91)*</b>                                      | <b>2.39 (1.06, 5.43)*</b>                                      |
| <b>Major Depressive disorder</b>        |                                 |                                                                |                                                                |                                                                |                                                                |
| Mild                                    | 297 (2.52, 0.20)                | <b>2.96 (1.82, 4.82)*</b>                                      | <b>1.97 (1.15, 3.37)*</b>                                      | <b>2.37 (1.39, 4.04)*</b>                                      | 1.49 (0.88, 2.53)                                              |
| Moderate                                | 190 (1.52, 0.14)                | <b>3.29 (1.81, 6.01)*</b>                                      | 1.89 (0.98, 3.70)                                              | <b>2.73 (1.27, 5.84)*</b>                                      | 1.53 (0.79, 2.96)                                              |
| Severe                                  | 164 (1.29, 0.12)                | <b>5.73 (3.96, 8.30)*</b>                                      | <b>3.03 (2.11, 4.35)*</b>                                      | <b>4.25 (2.01, 8.99)*</b>                                      | <b>1.99 (1.02, 3.91)*</b>                                      |
| <i>Trend</i>                            |                                 | $\chi^2=111.83, p<.0001$                                       | $\chi^2=44.19, p<.0001$                                        | $\chi^2=21.19, p<.0001$                                        | $\chi^2=6.04, p<.001$                                          |

<sup>1</sup>SE= Standard error of estimates; <sup>2</sup>Model 1= Adjusted for age and sex; <sup>3</sup>Model 2= Adjusted for age, sex, marital status, migrant status, income, employment status, educational status, any alcohol use/dependence disorders, any drug use/dependence disorders, and any traumatic life events (in Model 2 anxiety disorders were adjusted for major depressive disorder and vice versa)

<sup>4</sup>OR=Odds Ratio; <sup>5</sup>CI= Confidence Interval; \*significance:  $p<0.001$

## Appendix 1 CIDI Screen items and Probes for delusional-like experiences<sup>1</sup> (n=10,554<sup>2</sup>)

---

### *Item G1:*

In the past 12 months, have you felt that your thoughts were being directly interfered with or controlled by another person?

*If yes, G1A:*

*Did it come about in a way that many people would find hard to believe, for instance, through telepathy?*

### *Item G2:*

In the past 12 months, have you had a feeling that people were too interested in you?

*If yes, G2A:*

*In the past 12 months, have you had a feeling that things were arranged so as to have a special meaning for you, or even that harm might come to you?*

### *Item G3:*

Do you have any special powers that most people lack?

*If yes, G3A:*

*Do you belong to a group of people who also have these powers?*

### *Item G4:*

Has a doctor ever told you that you may have schizophrenia?

---

<sup>1</sup>Screen items (lifetime) with answer (Yes/No): 'Any screen' items required 'Yes' answers to all three questions G1, G2 & G3.

#Probe items (lifetime) with answer (Yes/No): 'Any probe' items required 'Yes' answers to G1A and G2A, and 'No' answer to G3A.

<sup>2</sup>sample excludes item G4 (*Has a doctor ever told you that you may have schizophrenia?*) (n=87)

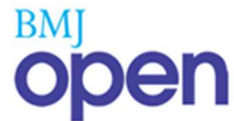

**Anxiety and depressive disorders are associated with delusional-like experiences: a replication study based on a national mental health survey**

|                                 |                                                                                                                                                                                                                                                                                                                          |
|---------------------------------|--------------------------------------------------------------------------------------------------------------------------------------------------------------------------------------------------------------------------------------------------------------------------------------------------------------------------|
| Journal:                        | <i>BMJ Open</i>                                                                                                                                                                                                                                                                                                          |
| Manuscript ID:                  | bmjopen-2012-001001.R1                                                                                                                                                                                                                                                                                                   |
| Article Type:                   | Research                                                                                                                                                                                                                                                                                                                 |
| Date Submitted by the Author:   | 30-Mar-2012                                                                                                                                                                                                                                                                                                              |
| Complete List of Authors:       | Saha, Sukanta; The Park Centre for Mental Health, Queensland Centre for Mental Health Research<br>Scott, James; The Park Centre for Mental Health, Queensland Centre for Mental Health Research<br>Varghese, Daniel; Princess Alexandra Hospital,<br>McGrath, John; University of Queensland, Queensland Brain Institute |
| <b>Primary Subject Heading</b>: | Mental health                                                                                                                                                                                                                                                                                                            |
| Secondary Subject Heading:      | Epidemiology, Mental health                                                                                                                                                                                                                                                                                              |
| Keywords:                       | EPIDEMIOLOGY, MENTAL HEALTH, Adult psychiatry < PSYCHIATRY, Schizophrenia & psychotic disorders < PSYCHIATRY                                                                                                                                                                                                             |
|                                 |                                                                                                                                                                                                                                                                                                                          |

SCHOLARONE™  
Manuscripts



1  
2  
3  
4  
5  
6  
7  
8  
9  
10  
11  
12  
13  
14  
15  
16  
17  
18  
19  
20  
21  
22  
23  
24  
25  
26  
27  
28  
29  
30  
31  
32  
33  
34  
35  
36  
37  
38  
39  
40  
41  
42  
43  
44  
45  
46  
47  
48  
49  
50  
51  
52  
53  
54  
55  
56  
57  
58  
59  
60

## Article summary

### Article focus

The study was undertaken in order

1. to examine the association between delusional-like experiences (DLE), and (a) broadly defined anxiety disorders, and (b) major depressive disorders (MDD),
2. to explore the association between DLE and a range of specific anxiety disorders, and
3. to examine if severity of major depressive disorder influenced the risk of endorsement of DLE

### Key message

1. Having a lifetime diagnosis of either any anxiety disorder or major depressive disorders (MDD) was significantly associated with the endorsement of delusional-like experiences (DLE).
2. The association was found for each of the main anxiety disorders when examined separately.
3. There was a dose response relationship between increasing severity of MDD and higher odds of DLE endorsement

### Strengths and limitations

Strength:

1. The data were drawn from the nationally representative sample from the Australia general population

Limitation:

1. Cross-sectional study

1  
2  
3  
4  
5  
6  
7  
8  
9 *Abstract: 293 words*

10 *Main text: 2145 (excluding tables and references)*

11 *Tables 3*

12 *Appendices: 1*

13 *Key words: Delusional-like experiences, Anxiety disorders, Depressive disorders*

14  
15  
16 Anxiety and depressive disorders are associated with delusional-like  
17 experiences: a replication study based on a national mental health survey

18  
19  
20 Sukanta Saha\* <sup>1</sup>

21 James Scott <sup>1,2,3,4</sup>

22  
23 Daniel Varghese<sup>5</sup>

24  
25 John McGrath <sup>1,4,6</sup>

- 26  
27 1. Queensland Centre for Mental Health Research, The Park Centre for Mental  
28 Health, Wacol, QLD 4076, Australia
- 29 | 2. Metro North Mental Health, Royal Brisbane and Women's Hospital, Brisbane,  
30 QLD, Australia
- 31 | 3. The University of Queensland Centre for Clinical Research, Brisbane, QLD,  
32 Australia
- 33 | 4. Discipline of Psychiatry, University of Queensland, St Lucia, QLD, Australia
- 34 | 5. Princess Alexandra Hospital, Woolloongabba, QLD 4102, Australia
- 35 | 6. Queensland Brain Institute, University of Queensland, St Lucia, QLD, Australia
- 36  
37  
38  
39  
40  
41

Formatted: Space Before: 0.6 line, After: 0.6 line

Formatted: Space Before: 0.6 line, After: 0.6 line

42 **Corresponding author:**

43 Dr Sukanta Saha

44 Queensland Centre for Mental Health Research,  
45 The Park Centre for Mental Health,  
46 Wacol, Queensland, 4076, Australia.  
47 sukanta\_saha@qcmhr.uq.edu.au  
48 Phone: +61 7 3271 8689  
49 Fax: +61 7 3271 8698  
50  
51  
52  
53  
54  
55  
56  
57  
58  
59  
60

## Abstract

### Objectives

There is growing evidence that delusional-like experiences (DLE) are associated with common mental disorders. In particular, a National Mental Health survey conducted in Australia during 2007 reported an association between DLE and both anxiety disorder and major depressive disorder (MDD). However, the previous study did not examine this association with respect to subtypes of anxiety disorder nor with severity of MDD. The aim of this study was to examine the associations between DLE and both anxiety disorder and MDD in more detail based on an independent population sample.

### Design

Cross-sectional study

### Setting

Subjects were drawn from the Australian Survey of Mental Health and Wellbeing 1997 using a stratified multistage area sampling of persons living in private dwellings in all States and Territories of Australia.

### Participants

Approximately 13,600 private dwellings were initially selected with one person aged 18 years or over from each dwelling invited to participate. In total, 10,641 individuals participated in the survey.

### Primary and secondary outcome measures

The Composite International Diagnostic Interview (CIDI) was used to identify individuals with DLE and DSM IV lifetime diagnoses of anxiety disorders and MDD. The influence of various anxiety disorders and MDD on DLE was assessed with logistic regression.

### Results

1  
2  
3  
4  
5  
6  
7  
8  
9 Having a lifetime diagnosis of either any anxiety disorder or MDD was significantly  
10 associated with the endorsement of DLE. The association was found for each of the  
11 main anxiety disorders when examined separately. There was a dose response  
12 relationship between increasing severity of MDD and higher odds of DLE endorsement.  
13  
14

### 15 **Conclusions**

16  
17 Delusional-like experiences are associated with a wide range of anxiety disorders and  
18 are more prevalent in those with MDD. Understanding the relationship between DLE,  
19 anxiety disorders and depression may provide insights into shared pathways that  
20 underpin both psychotic disorders and common mental disorders.  
21  
22  
23  
24  
25  
26  
27  
28  
29  
30  
31  
32  
33  
34  
35  
36  
37  
38  
39  
40  
41  
42  
43  
44  
45  
46  
47  
48  
49  
50  
51  
52  
53  
54  
55  
56  
57  
58  
59  
60

1  
2  
3  
4  
5  
6  
7  
8  
9  
10  
11  
12  
13  
14  
15  
16  
17  
18  
19  
20  
21  
22  
23  
24  
25  
26  
27  
28  
29  
30  
31  
32  
33  
34  
35  
36  
37  
38  
39  
40  
41  
42  
43  
44  
45  
46  
47  
48  
49  
50  
51  
52  
53  
54  
55  
56  
57  
58  
59  
60

## INTRODUCTION

There is now robust evidence indicating that hallucinations and delusional-like experiences (DLE) are common in the general population. In recent years the field has focused on the demographic and clinical correlates of hallucinations and DLE.<sup>1-9</sup> Of particular interest, there is a growing body of evidence reporting an association between DLE endorsement and common mental disorders such as anxiety disorders and major depressive disorder (MDD). For example, panic attacks during adolescence were significantly associated with increased levels of DLE among young adults.<sup>10</sup> In the NEMESIS study, subjects with obsessive compulsive symptoms were more likely to develop incident psychotic symptoms three years later.<sup>11</sup> Conversely, a Swiss-based cohort reported that young adults with psychotic-like experiences were significantly more likely to later develop common mental disorders such as anxiety disorders and MDD.<sup>12</sup> A German community-based study found an association between social phobia, social anxiety and DLE,<sup>13</sup> while a US primary-care based sample reported that those who reported psychotic-like experiences were more likely to have generalized anxiety disorders and panic disorders.<sup>14</sup>

Trauma exposure with or without post-traumatic stress disorder has been associated with DLE.<sup>7</sup> Several Australian studies<sup>9,15,16</sup> have found significant associations between DLE, and broadly-defined anxiety disorders, however to date these studies did not report on subtypes of anxiety disorders. In light of the evidence linking DLE with a wide range of different types of anxiety disorders, the evidence suggests that DLE are nonspecifically associated with anxiety disorders.

1  
2  
3  
4  
5  
6  
7  
8  
9 With respect to depression, several studies have found that individuals with depression  
10 are significantly more likely to endorse DLE.<sup>9,15-17</sup> Studies also show that DLE requiring  
11 clinical care were progressively more likely to occur with greater levels of affective  
12 dysregulation (depressive symptoms and hypo-manic symptoms).<sup>18</sup> Importantly, there  
13 was a significant association between severity of depressive symptoms and persistence  
14 of psychotic symptoms.  
15  
16  
17  
18  
19

20  
21 While longitudinal studies are required to explore the temporal sequence between  
22 depression, anxiety and DLE, we had the opportunity to replicate our previous findings  
23 with respect to the cross-sectional association between DLE and (a) broadly defined  
24 anxiety disorders, and (b) MDD.<sup>9</sup> Based on our previous studies, we predicted that  
25 those with anxiety disorder or major depression disorder would be more likely to  
26 endorse DLE. In addition, we were able to explore the association between DLE and a  
27 range of specific anxiety disorders. Furthermore, we were able to examine if severity of  
28 major depressive disorder influenced the risk of endorsement of DLE – we predicted  
29 that those with more severe MDD would be more likely to endorse DLE compared to  
30 those with milder forms of MDD.  
31  
32  
33  
34  
35  
36  
37  
38  
39  
40  
41  
42  
43

## 44 **METHODS**

### 45 **Participants**

1  
2  
3  
4  
5  
6  
7  
8  
9 The data were drawn from the 1997 National Survey of Mental Health and Wellbeing  
10 conducted in Australia by the Australian Bureau of Statistics (ABS) from a  
11 representative sample (random stratified multistage area sampling) of persons living in  
12 private dwellings in all States and Territories of Australia. Details of the survey  
13 methodology were published elsewhere.<sup>19</sup> In brief, approximately 13,600 private  
14 dwellings were initially selected with one person aged 18 years or over from each  
15 dwelling invited to participate. In total, 10,641 individuals participated in the survey,  
16 representing a response rate of 78%. Interviews were carried out by trained interviewers  
17 from the ABS, a statutory body responsible for conducting such surveys using ethical  
18 protocols that include written informed consent.  
19  
20  
21  
22  
23  
24  
25  
26  
27  
28

### 29 **Assessment of delusional-like experiences and DSM-IV diagnoses**

30  
31  
32  
33 Mental disorders were assessed by a modified version of the Composite International  
34 Diagnostic Interview (CIDI)<sup>20</sup> which yielded diagnoses of DSM-IV disorders. Briefly,  
35 within the CIDI there are three items related to identifying individuals who may be  
36 psychotic (*G Items*: “screening items”). For those who endorsed the screen item, a  
37 follow-up item was used to further explore the delusional-like nature of the experiences  
38 (“probe items”). Full details of the screen and probe items are provided in Appendix 1.  
39 The items covered the following features of psychotic disorders: delusions of control,  
40 thought interference and passivity (Question 1 and 1a); delusions of reference or  
41 persecution (Question 2 and 2a); and grandiose delusions (Question 3 and 3a). There  
42 was no item to assess hallucinations.  
43  
44  
45  
46  
47  
48  
49  
50  
51  
52  
53  
54  
55  
56  
57  
58  
59  
60

1  
2  
3  
4  
5  
6  
7  
8  
9 Based on CIDI-derived DSM-IV criteria, we identified subjects who had lifetime  
10 diagnoses of: (a) an anxiety disorder, (b) major depressive disorder. Anxiety disorders  
11 included panic disorder with or without agoraphobia, social phobia, generalised anxiety  
12 disorder (GAD), obsessive compulsive disorder (OCD), and agoraphobia without panic  
13 disorder. For those with MDD, allocation to subtypes was based on the total number of  
14 particular 'depressive' symptoms with the duration of at least two weeks. Full details of  
15 the symptom list and related rules to deal with multiple episodes can be found in the full  
16 report.<sup>21</sup> In brief, mild MDD was characterised by the presence of at least four  
17 symptoms, moderate MDD with at least six symptoms, and severe MDD with at least  
18 eight symptoms. These subtypes of MDD were mutually exclusive.  
19  
20  
21  
22  
23  
24  
25  
26  
27  
28

29 To ascertain trauma exposure, the CIDI elicits responses from 10 questions pertaining  
30 to past exposure to traumatic events. Details of the trauma variables have been  
31 published previously by our group.<sup>7</sup>  
32  
33  
34  
35

36 In keeping with our previous analyses<sup>1-9</sup> individuals who screened positively for  
37 schizophrenia (i.e. respondents who reported 'Yes' to the item "*Had been told at any*  
38 *time by a psychiatrist that they had schizophrenia*") were excluded from the analyses  
39 (n=87) leaving a total of 10,554 subjects for this study.  
40  
41  
42  
43  
44

## 45 46 **Statistical analysis** 47

48  
49 To examine the association between DLE and both anxiety disorders and MDD, logistic  
50 models were fitted to the data while adjusting for various confounding factors. Because  
51  
52  
53



1  
2  
3  
4  
5  
6  
7  
8  
9  
10  
11  
12  
13  
14  
15  
16  
17  
18  
19  
20  
21  
22  
23  
24  
25  
26  
27  
28  
29  
30  
31  
32  
33  
34  
35  
36  
37  
38  
39  
40  
41  
42  
43  
44  
45  
46  
47  
48  
49  
50  
51  
52  
53  
54  
55  
56  
57  
58  
59  
60

sex and age are associated with DLE,<sup>16,22</sup> we included these as covariates in the main analyses. In keeping with our previous studies, we included a range of CIDI-derived, potential confounding variables in Model 2. These include substance misuse,<sup>23</sup> marital status, and migrant status,<sup>24</sup> educational status, employment status and family income, and trauma exposure.<sup>2,4,6,7,24</sup> As co-morbidity frequently occurs between anxiety disorders and MDD, we also adjusted for the presence of the other psychiatric diagnoses under investigation (i.e. the association between MDD and DLE was adjusted for the presence of anxiety disorders, and the association between anxiety disorders and DLE was adjusted for the presence of Major Depressive Disorder).

For secondary analyses (a sensitivity analysis), we repeated the main analyses excluding the second screen items (“Have you ever had a feeling that people were too interested in you?”) because clinical experience suggests that this is a common experience in social anxiety.

The sample was weighted to adjust for differential probabilities of selection within households, over-sampling of population subgroups and non-response to match census population distribution on a number of geographic and socio-demographic variables.

The initial weights were calibrated against known population estimates. Replicate weight variables were developed using the Jack-knife procedure of replication (i.e., the analysis was repeated after one subject was dropped and then the standard error was derived from the distribution of results from all “minus one” resamples).<sup>25</sup> Analyses were performed using Proc *Surveylogistic*<sup>26</sup> which is designed to analyse complex survey sample using SAS (version 9.3; Cary, NC: SAS Institute). Chi-square test-for-

1  
2  
3  
4  
5  
6  
7  
8  
9 linear trend was used to assess dose-response relationships between the exposure  
10 variables and DLE.  
11

## 12 13 14 **RESULTS**

15  
16  
17  
18 Of the 10 554 subjects surveyed, 11.6% (n=1276) positively endorsed one or more DLE  
19 items (Table 1). There was a weak effect of females being more likely to endorse DLE  
20 than males (Odd Ratio (OR) 1.05; 95% Confidence Intervals (CI) 1.04-1.05). The  
21 prevalence of lifetime diagnosis of any anxiety disorder was 4.9% (n=580), and the  
22 prevalence of lifetime depressive disorders was 5.3% (n=651).  
23  
24  
25  
26  
27

28  
29  
30 Insert Table 1 about here  
31

32  
33  
34 As predicted, the main analyses showed that those with any anxiety disorder and  
35 participants who had lifetime diagnosis of MDD were significantly more likely to endorse  
36 delusional-like experiences. Those with anxiety disorders were two to three times more  
37 likely to endorse both DLE screen and probe items (Table 2), and those with a  
38 diagnosis of major depressive disorder were also two to three times more likely to  
39 endorse DLE screen and probe items.  
40  
41  
42  
43  
44  
45

46  
47  
48 Insert Table 2 about here  
49

1  
2  
3  
4  
5  
6  
7  
8  
9  
10  
11  
12  
13  
14  
15  
16  
17  
18  
19  
20  
21  
22  
23  
24  
25  
26  
27  
28  
29  
30  
31  
32  
33  
34  
35  
36  
37  
38  
39  
40  
41  
42  
43  
44  
45  
46  
47  
48  
49  
50  
51  
52  
53  
54  
55  
56  
57  
58  
59  
60

Concerning the subtypes of anxiety disorders, each disorder was significantly associated with DLE screen items, and there were no marked differences in the effect sizes between the different disorders (Table 3). There was a dose response relationship between the severity of the MDD and DLE in which severe depression showed twice the odds of endorsement of DLE screen items compared with a diagnosis of mild major depressive disorder with a significant linear trend ( $\chi^2=44.19$ ,  $p<.0001$ ). Broadly similar (but less precise) associations were also found for probe items.

Insert Table 3 about here

In the secondary analysis, when we conducted the models using two DLE items (G1 & G3), the pattern of significant association for major anxiety and depressive disorders remained unchanged (data not shown).

## DISCUSSION

Individuals with a lifetime diagnosis of major depressive disorder or an anxiety disorder were significantly more likely to report DLE compared to those without these disorders.

We found that each subtype of anxiety disorder was associated with DLE, and there were no marked differences in the effect sizes for these associations (the confidence intervals around these associations overlapped). Based on this same sample, we have previously demonstrated that trauma exposure without Post-traumatic Stress Disorder

1  
2  
3  
4  
5  
6  
7  
8  
9 was associated with DLE.<sup>7</sup> Our new findings add additional weight to the conclusion  
10 that a range of disorders with prominent anxiety symptoms are associated with DLE.  
11  
12

13  
14 As predicted, there was also a dose response relationship between severity of MDD  
15 and DLE. All associations remained significant when adjusted for associated co-  
16 morbidity with anxiety, alcohol and illicit substance misuse and any traumatic life events  
17 indicating that the associations are independent of co-morbid psychiatric illnesses, and  
18 selected environmental and demographic risk factors.  
19  
20  
21  
22

23  
24  
25 The mechanisms linking DLE with anxiety disorder and MDD remain unclear. However,  
26 there is evidence to suggest that shared familial factors may contribute to these  
27 findings. Based on a large, population-based sample (n = 8841), we found that  
28 regardless of the presence of a mental illness experienced by the respondents, those  
29 who reported a family history of depressive disorder in a first-degree relative had an  
30 increased odds of endorsing DLE (Adjusted odds ratio 1.53; 95% CI 1.19-1.96). With  
31 respect to the presence of a first degree relative with an anxiety disorder and DLE,  
32 similar odds were identified (Adjusted OR 1.59; 95%CI 1.23-2.05). Thus, the presence  
33 of an anxiety disorder of MDD in respondents, or the presence of a family history of  
34 either disorder in otherwise well individuals, are both associated with DLE. As the  
35 genetic architecture of anxiety and mood disorders is unravelled, it will be of interest to  
36 explore if common polymorphisms linked to these disorders are also associated with  
37 DLE.  
38  
39  
40  
41  
42  
43  
44  
45  
46  
47  
48  
49  
50  
51  
52  
53  
54  
55  
56  
57  
58  
59  
60

1  
2  
3  
4  
5  
6  
7  
8  
9 With respect to more proximal mechanisms, it is reasonable to presume that anxiety  
10 disorders or major depressive disorder lead to heightened vulnerability for the onset of  
11 delusional-like experiences. While the causal pathway is unknown, it may stem from  
12 destabilizing effects of severe anxiety or depression on emotional and cognitive  
13 functioning<sup>27,28</sup> which may lead to aberrant assignment of salience and delusional  
14 experiences.<sup>29</sup> However, it is also possible that acute psychotic episodes can precede  
15 and predict anxiety or depressive disorders.<sup>11</sup>  
16  
17  
18  
19  
20  
21  
22  
23

24 The study has several limitations. Importantly, this study was cross-sectional and  
25 therefore, it was not possible to establish the direction of causality between anxiety and  
26 depressive disorder, and DLE. While the CIDI has some information about the age of  
27 onset and the presence of the disorder in the past year, we do not have this information  
28 for the DLE. Prospective studies would be best suited to explore the temporal sequence  
29 of the variables of interest. While the interviewers were trained, the diagnoses of MDD  
30 and anxiety disorders were not validated by clinical assessment. However, the CIDI is  
31 generally regarded as having good psychometric properties for common mental  
32 disorders.<sup>30</sup> Comorbidity between anxiety disorders and MDD is common, and while we  
33 included adjustments in the our models to attempt to account for this feature, the  
34 complex nature of the relationships between DLE, MDD and anxiety disorders could  
35 reduce the accuracy of the odds ratios.<sup>31</sup> We had a small number of screen and probe  
36 items to measure delusional-like experiences and there were no items for  
37 hallucinations. However, previous general population studies have found a strong  
38 association between the presence of DLE and hallucinations.<sup>24,32-34</sup>  
39  
40  
41  
42  
43  
44  
45  
46  
47  
48  
49  
50  
51  
52  
53  
54  
55  
56  
57  
58  
59  
60

1  
2  
3  
4  
5  
6  
7  
8  
9 There is now robust and consistent evidence indicating that those with anxiety disorders  
10 and MDD have an increased risk of DLE. For example, clinicians involved in the care of  
11 those with primary diagnoses of anxiety disorder or depression may not routinely  
12 enquire about DLE. In light of the association between DLE and suicidal  
13 ideation/behaviour,<sup>3</sup> the presence of these experiences may suggest that clinical care  
14 plans place greater emphasis on the detection and management of suicidal ideation. It  
15 is too early to be making such recommendations with confidence. However,  
16 understanding the relationship and time course between DLE, and anxiety and  
17 depression may provide insights into shared pathways that underpin both psychotic  
18 disorders and common mental disorders. Once we understand these causal pathways,  
19 potential clinical implications warrant closer scrutiny.  
20  
21  
22  
23  
24  
25  
26  
27  
28  
29  
30

31 **Competing interest** None  
32  
33

34 **Funding** This research received no specific grant from any funding agency in the  
35 public, commercial or not-for-profit sectors.  
36  
37  
38

39 **Contributors** JM, SS and JS have directly participated in the planning and execution  
40 of the study. SS analysed the data. All authors have critically read, and approved the  
41 final version submitted.  
42  
43  
44

45 **Provenance and peer review** Not commissioned; externally peer reviewed  
46  
47

48 **Data sharing statement** The data are available from the Australian Bureau of  
49 Statistics  
50  
51  
52

## References

1. Saha S, Scott J, Varghese D, et al. The association between physical health and delusional-like experiences: a general population study. *PLoS One* 2011; 6: e18566.
2. Saha S, Scott J, Varghese D, et al. The association between socio-economic disadvantage and delusion-like experiences: a nationwide population-based study. *European Psychiatry* 2011; doi: 10.1016/j.eurpsy.2011.09.004 (Epub ahead of print).
3. Saha S, Scott JG, Johnston AK, et al. The association between delusional-like experiences and suicidal thoughts and behaviour. *Schizophr Res* 2011; 132: 197-202.
4. Saha S, Scott JG, Varghese D, et al. The association between delusional-like experiences, and tobacco, alcohol or cannabis use: a nationwide population-based survey. *BMC Psychiatry* 2011; 11: 202.
5. Saha S, Scott JG, Varghese D, et al. The association between general psychological distress and delusional-like experiences: a large population-based study. *Schizophr Res* 2011; 127: 246-251.
6. Saha S, Varghese D, Slade T, et al. The association between trauma and delusional-like experiences. *Psychiatry Res* 2011; 189: 259-264.
7. Scott J, Chant D, Andrews G, et al. Association between trauma exposure and delusional experiences in a large community-based sample. *Br J Psychiatry* 2007; 190: 339-343.

- 1  
2  
3  
4  
5  
6  
7  
8  
9 8. Scott J, Chant D, Andrews G, et al. Psychotic-like experiences in the general  
10 community: the correlates of CID-I psychosis screen items in an Australian  
11 sample. *Psychol Med* 2006; 36: 231-238.  
12  
13  
14 9. Varghese D, Saha S, Scott JD, et al. The association between family history of  
15 mental disorder and delusional-like experiences: a general population study. *Am*  
16 *J Med Genet B Neuropsychiatr Genet* 2011; 156B: 478-483.  
17  
18  
19 10. Goodwin RD, Fergusson DM, Horwood LJ. Panic attacks and psychoticism. *Am J*  
20 *Psychiatry* 2004; 161: 88-92.  
21  
22  
23 11. van Dael F, van Os J, de Graaf R, et al. Can obsessions drive you mad?  
24 Longitudinal evidence that obsessive-compulsive symptoms worsen the outcome  
25 of early psychotic experiences. *Acta Psychiatr Scand* 2011; 123: 136-146.  
26  
27  
28 12. Rossler W, Hengartner MP, Ajdacic-Gross V, et al. Sub-clinical psychosis symptoms  
29 in young adults are risk factors for subsequent common mental disorders.  
30 *Schizophr Res* 2011; 131: 18-23.  
31  
32  
33 13. Schutters SI, Dominguez MD, Knappe S, et al. The association between social  
34 phobia, social anxiety cognitions and paranoid symptoms. *Acta Psychiatr Scand*  
35 2011.  
36  
37  
38 14. Olsson M, Lewis-Fernandez R, Weissman MM, et al. Psychotic symptoms in an  
39 urban general medicine practice. *Am J Psychiatry* 2002; 159: 1412-1419.  
40  
41  
42 15. Yung AR, Buckby JA, Cosgrave EM, et al. Association between psychotic  
43 experiences and depression in a clinical sample over 6 months. *Schizophr Res*  
44 2007; 91: 246-253.  
45  
46  
47  
48  
49  
50  
51  
52  
53  
54  
55  
56  
57  
58  
59  
60



1  
2  
3  
4  
5  
6  
7  
8  
9  
10  
11  
12  
13  
14  
15  
16  
17  
18  
19  
20  
21  
22  
23  
24  
25  
26  
27  
28  
29  
30  
31  
32  
33  
34  
35  
36  
37  
38  
39  
40  
41  
42  
43  
44  
45  
46  
47  
48  
49  
50  
51  
52  
53  
54  
55  
56  
57  
58  
59  
60

16. Varghese D, Scott J, Welham J, et al. Psychotic-like experiences in major depression and anxiety disorders: a population-based survey in young adults. *Schizophr Bull* 2011; 37: 389-393.
17. Armando M, Nelson B, Yung AR, et al. Psychotic-like experiences and correlation with distress and depressive symptoms in a community sample of adolescents and young adults. *Schizophr Res* 2010; 119: 258-265.
18. van Rossum I, Dominguez MG, Lieb R, et al. Affective dysregulation and relativity distortion: a 10-year prospective study of their association and clinical relevance. *Schizophr Bull* 2011; 37: 561-571.
19. Andrews G, Henderson S, Hall W. Prevalence, comorbidity, disability and service utilisation. Overview of the Australian National Mental Health Survey. *Br J Psychiatry* 2001; 178: 145-153.
20. WHO. Composite International Diagnostic Interview- Version 1.1: World Health Organisation: Geneva 1993.
21. Australian Bureau of Statistics. National Survey of Mental Health and Wellbeing: summary of results, 2007 (Explanatory notes). Cat No. 4326.0; Australian Bureau of Statistics C, editor: Australian Bureau of Statistics: Canberra 2008.
22. Varghese D, Scott J, McGrath J. Correlates of delusion-like experiences in a non-psychotic community sample. *Aust N Z J Psychiatry* 2008; 42: 505-508.
23. Degenhardt L, Hall W. The association between psychosis and problematical drug use among Australian adults: findings from the National Survey of Mental Health and Well-Being. *Psychological Medicine* 2001; 31: 659-668.

- 1  
2  
3  
4  
5  
6  
7  
8  
9 24. Scott J, Welham J, Martin G, et al. Demographic correlates of psychotic-like  
10 experiences in young Australian adults. *Acta Psychiatr Scand* 2008; 118: 230-  
11 237.  
12  
13  
14 25. Rust KF, Rao JN. Variance estimation for complex surveys using replication  
15 techniques. *Stat Methods Med Res* 1996; 5: 283-310.  
16  
17  
18 26. An AB Performing logistic regression on survey data with the new  
19 SURVEYLOGISTIC procedure. Proceedings of the Twenty-Seven Annual SAS  
20 Users Group International Conference. Paper 258 ed:  
21 <http://www2.sas.com/proceedings/sugi27/p258-27.pdf>. 2004.  
22  
23  
24  
25 27. Austin MP, Mitchell P, Goodwin GM. Cognitive deficits in depression: possible  
26 implications for functional neuropathology. *Br J Psychiatry* 2001; 178: 200-206.  
27  
28  
29 28. Murrough JW, Iacoviello B, Neumeister A, et al. Cognitive dysfunction in depression:  
30 Neurocircuitry and new therapeutic strategies. *Neurobiol Learn Mem* 2011.  
31  
32  
33 29. van Os J, Tamminga C. Deconstructing psychosis. *Schizophr Bull* 2007; 33: 861-  
34 862.  
35  
36  
37 30. Andrews G, Peters L. The psychometric properties of the Composite International  
38 Diagnostic Interview. *Soc Psychiatry Psychiatr Epidemiol* 1998; 33: 80-88.  
39  
40  
41 31. Hernan MA, Hernandez-Diaz S, Werler MM, et al. Causal knowledge as a  
42 prerequisite for confounding evaluation: an application to birth defects  
43 epidemiology. *Am J Epidemiol* 2002; 155: 176-184.  
44  
45  
46 32. Hanssen MS, Bijl RV, Vollebergh W, et al. Self-reported psychotic experiences in  
47 the general population: a valid screening tool for DSM-III-R psychotic disorders?  
48 *Acta Psychiatr Scand* 2003; 107: 369-377.  
49  
50  
51  
52  
53  
54  
55  
56  
57  
58  
59  
60

1  
2  
3  
4  
5  
6  
7  
8  
9  
10  
11  
12  
13  
14  
15  
16  
17  
18  
19  
20  
21  
22  
23  
24  
25  
26  
27  
28  
29  
30  
31  
32  
33  
34  
35  
36  
37  
38  
39  
40  
41  
42  
43  
44  
45  
46  
47  
48  
49  
50  
51  
52  
53  
54  
55  
56  
57  
58  
59  
60

33. Lincoln TM, Peter N, Schafer M, et al. Impact of stress on paranoia: an experimental investigation of moderators and mediators. *Psychol Med* 2008; 1-11.

34. Scott J, Martin G, Welham J, et al. Psychopathology during childhood and adolescence predicts delusional-like experiences in adults: a 21-year birth cohort study. *Am J Psychiatry* 2009; 166: 567-574.

**Table 1. Descriptive statistics of delusional-like experiences (Screen items), anxiety disorder and major depressive disorder (n=10,554)**

| Exposure                                             | Sample<br>n (%) | Delusional-like experiences endorsement |              |
|------------------------------------------------------|-----------------|-----------------------------------------|--------------|
|                                                      |                 | No (%)                                  | Yes (%)      |
| Total sample                                         | 10,554 (100.00) | 9278 (88.44)                            | 1276 (11.56) |
| Anxiety and depressive disorders                     |                 |                                         |              |
| No Anxiety disorders                                 | 9974 (95.13)    | 8900 (85.16)                            | 1074 (9.97)  |
| <sup>1</sup> Any Anxiety disorders: lifetime         | 580 (4.87)      | 378 (4.29)                              | 202 (16.88)  |
| No Major depressive disorder                         |                 |                                         |              |
| No Major depressive disorder                         | 9903 (94.66)    | 8834 (84.76)                            | 1069 (9.89)  |
| <sup>2</sup> Any Major depressive disorder: lifetime | 651 (5.34)      | 444 (4.77)                              | 207 (16.78)  |

<sup>1</sup>Anxiety disorders based on CIDI DSM diagnosis

<sup>2</sup>Major depressive disorder based on CIDI DSM diagnosis

**Table 2. Association between delusional-like experiences, and anxiety disorders and major depressive disorder (n=10,554)**

| Disorders                                        | Delusional-like experiences                                    |                                                                |                                                                |                                                                |
|--------------------------------------------------|----------------------------------------------------------------|----------------------------------------------------------------|----------------------------------------------------------------|----------------------------------------------------------------|
|                                                  | Screen items                                                   |                                                                | Probe items                                                    |                                                                |
|                                                  | Model 1 <sup>1</sup><br>OR <sup>3</sup> (95% CI <sup>4</sup> ) | Model 2 <sup>2</sup><br>OR <sup>3</sup> (95% CI <sup>4</sup> ) | Model 1 <sup>1</sup><br>OR <sup>3</sup> (95% CI <sup>4</sup> ) | Model 2 <sup>2</sup><br>OR <sup>3</sup> (95% CI <sup>4</sup> ) |
| Anxiety disorders: lifetime <sup>@</sup>         | 3.88<br>(2.92, 5.16)*                                          | 2.43<br>(1.91, 3.09)*                                          | 3.36<br>(1.86, 6.05)*                                          | 2.12<br>(1.27, 3.54)*                                          |
| Major depressive disorder: Lifetime <sup>#</sup> | 3.63<br>(2.75, 4.79)*                                          | 2.17<br>(1.65, 2.86)*                                          | 2.91<br>(1.84, 4.59)*                                          | 1.63<br>(1.10, 2.42)*                                          |

<sup>1</sup>Model 1= Adjusted for age and sex

<sup>2</sup>Model 2= Adjusted for age, sex, marital status, migrant status, income, employment status, educational status, any alcohol use/dependence disorders, any drug use/dependence disorders, and any traumatic life events  
(in Model 2 anxiety disorders were adjusted for major depressive disorder and vice versa)

<sup>@#</sup>Anxiety and depressive disorders were based on CIDI DSM diagnosis

<sup>3</sup>OR=Odds ratio; <sup>4</sup>CI= Confidence Interval

\*significance:  $p < 0.001$

**Table 3. Association between delusional-like experiences, and different individual exposure to lifetime anxiety disorders, and major depressive disorder (n=10,554)**

|                                         | Number<br>(%, SE <sup>1</sup> ) | Delusional-like experiences                                                    |                                                                |                                                                               |                                                                |
|-----------------------------------------|---------------------------------|--------------------------------------------------------------------------------|----------------------------------------------------------------|-------------------------------------------------------------------------------|----------------------------------------------------------------|
|                                         |                                 | Screen items<br>Model 1 <sup>2</sup><br>OR <sup>4</sup> (95% CI <sup>5</sup> ) | Model 2 <sup>3</sup><br>OR <sup>4</sup> (95% CI <sup>5</sup> ) | Probe items<br>Model 1 <sup>2</sup><br>OR <sup>4</sup> (95% CI <sup>5</sup> ) | Model 2 <sup>3</sup><br>OR <sup>4</sup> (95% CI <sup>5</sup> ) |
| <b>Anxiety disorders</b>                |                                 |                                                                                |                                                                |                                                                               |                                                                |
| Panic disorder with/without agoraphobia | 124 (1.02, 0.12)                | <b>4.56 (2.51, 8.33)*</b>                                                      | <b>2.40 (1.03, 5.63)*</b>                                      | <b>2.55 (1.13, 5.78)*</b>                                                     | 1.54 (0.77, 3.08)                                              |
| General anxiety                         | 311 (2.57, 0.23)                | <b>3.69 (2.57, 5.29)*</b>                                                      | <b>2.09 (1.50, 2.93)*</b>                                      | <b>3.05 (1.41, 6.58)*</b>                                                     | 1.77 (0.89, 3.51)                                              |
| Obsessive compulsive disorder           | 77 (0.69, 0.12)                 | <b>5.19 (2.69, 10.03)*</b>                                                     | <b>2.97 (1.50, 5.88)*</b>                                      | <b>4.60 (1.81, 11.74)*</b>                                                    | <b>2.68 (1.05, 6.84)*</b>                                      |
| Agoraphobia without panic disorder      | 60 (0.49, 0.06)                 | <b>5.18 (2.72, 9.85)*</b>                                                      | <b>3.49 (1.95, 6.28)*</b>                                      | <b>7.02 (3.73, 13.19)*</b>                                                    | <b>4.65 (1.98, 10.89)*</b>                                     |
| Social phobia                           | 160 (1.35, 0.14)                | <b>4.14 (2.81, 6.11)*</b>                                                      | <b>2.29 (1.63, 3.24)*</b>                                      | <b>4.15 (1.93, 8.91)*</b>                                                     | <b>2.39 (1.06, 5.43)*</b>                                      |
| <b>Major Depressive disorder</b>        |                                 |                                                                                |                                                                |                                                                               |                                                                |
| Mild                                    | 297 (2.52, 0.20)                | <b>2.96 (1.82, 4.82)*</b>                                                      | <b>1.97 (1.15, 3.37)*</b>                                      | <b>2.37 (1.39, 4.04)*</b>                                                     | 1.49 (0.88, 2.53)                                              |
| Moderate                                | 190 (1.52, 0.14)                | <b>3.29 (1.81, 6.01)*</b>                                                      | 1.89 (0.98, 3.70)                                              | <b>2.73 (1.27, 5.84)*</b>                                                     | 1.53 (0.79, 2.96)                                              |
| Severe                                  | 164 (1.29, 0.12)                | <b>5.73 (3.96, 8.30)*</b>                                                      | <b>3.03 (2.11, 4.35)*</b>                                      | <b>4.25 (2.01, 8.99)*</b>                                                     | <b>1.99 (1.02, 3.91)*</b>                                      |
| <i>Trend</i>                            |                                 | $\chi^2=111.83, p<.0001$                                                       | $\chi^2=44.19, p<.0001$                                        | $\chi^2=21.19, p<.0001$                                                       | $\chi^2=6.04, p<.001$                                          |

<sup>1</sup>SE= Standard error of estimates; <sup>2</sup>Model 1= Adjusted for age and sex; <sup>3</sup>Model 2= Adjusted for age, sex, marital status, migrant status, income, employment status, educational status, any alcohol use/dependence disorders, any drug use/dependence disorders, and any traumatic life events (in Model 2 anxiety disorders were adjusted for major depressive disorder and vice versa)

<sup>4</sup>OR=Odds Ratio; <sup>5</sup>CI= Confidence Interval; \*significance:  $p<0.001$

1  
2  
3  
4  
5  
6  
7  
8  
9  
10  
11  
12  
13  
14  
15  
16  
17  
18  
19  
20  
21  
22  
23  
24  
25  
26  
27  
28  
29  
30  
31  
32  
33  
34  
35  
36  
37  
38  
39  
40  
41  
42  
43  
44  
45  
46  
47  
48  
49

For peer review only

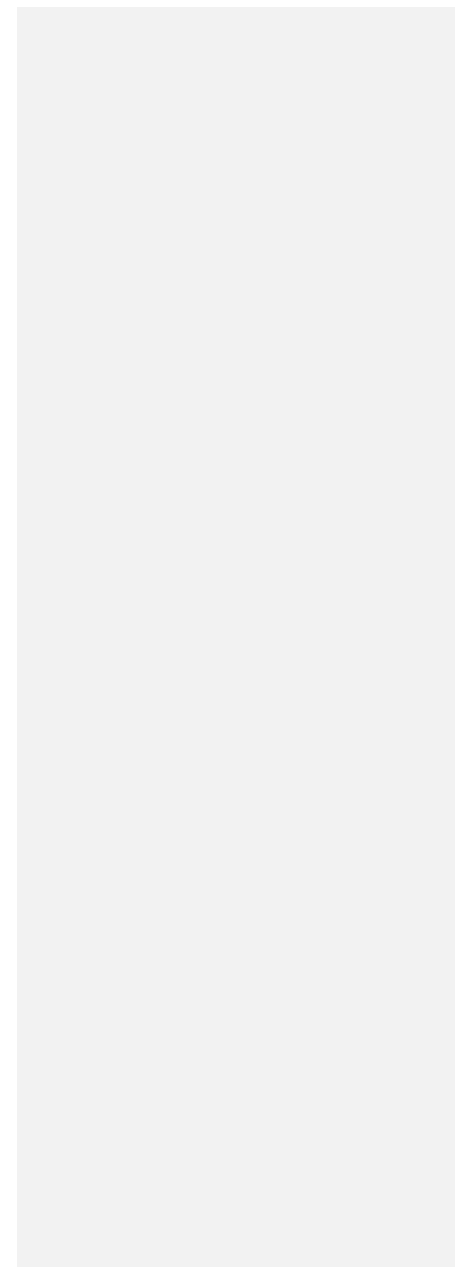

## Appendix 1 CIDI Screen items and Probes for delusional-like experiences<sup>1</sup> (n=10,554<sup>2</sup>)

---

### Item G1:

In the past 12 months, have you felt that your thoughts were being directly interfered with or controlled by another person?

*If yes, G1A:*

*Did it come about in a way that many people would find hard to believe, for instance, through telepathy?*

### Item G2:

In the past 12 months, have you had a feeling that people were too interested in you?

*If yes, G2A:*

*In the past 12 months, have you had a feeling that things were arranged so as to have a special meaning for you, or even that harm might come to you?*

### Item G3:

Do you have any special powers that most people lack?

*If yes, G3A:*

*Do you belong to a group of people who also have these powers?*

### Item G4:

Has a doctor ever told you that you may have schizophrenia?

---

<sup>1</sup>Screen items (lifetime) with answer (Yes/No): 'Any screen' items required 'Yes' answers to all three questions G1, G2 & G3.

#Probe items (lifetime) with answer (Yes/No): 'Any probe' items required 'Yes' answers to G1A and G2A, and 'No' answer to G3A.

<sup>2</sup>sample excludes item G4 (*Has a doctor ever told you that you may have schizophrenia?*) (n=87)



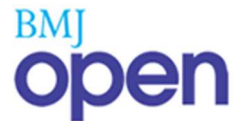

**Anxiety and depressive disorders are associated with delusional-like experiences: a replication study based on a national mental health survey**

|                                 |                                                                                                                                                                                                                                                                                                                          |
|---------------------------------|--------------------------------------------------------------------------------------------------------------------------------------------------------------------------------------------------------------------------------------------------------------------------------------------------------------------------|
| Journal:                        | <i>BMJ Open</i>                                                                                                                                                                                                                                                                                                          |
| Manuscript ID:                  | bmjopen-2012-001001.R2                                                                                                                                                                                                                                                                                                   |
| Article Type:                   | Research                                                                                                                                                                                                                                                                                                                 |
| Date Submitted by the Author:   | 25-Apr-2012                                                                                                                                                                                                                                                                                                              |
| Complete List of Authors:       | Saha, Sukanta; The Park Centre for Mental Health, Queensland Centre for Mental Health Research<br>Scott, James; The Park Centre for Mental Health, Queensland Centre for Mental Health Research<br>Varghese, Daniel; Princess Alexandra Hospital,<br>McGrath, John; University of Queensland, Queensland Brain Institute |
| <b>Primary Subject Heading</b>: | Mental health                                                                                                                                                                                                                                                                                                            |
| Secondary Subject Heading:      | Epidemiology, Mental health                                                                                                                                                                                                                                                                                              |
| Keywords:                       | EPIDEMIOLOGY, MENTAL HEALTH, Adult psychiatry < PSYCHIATRY, Schizophrenia & psychotic disorders < PSYCHIATRY                                                                                                                                                                                                             |
|                                 |                                                                                                                                                                                                                                                                                                                          |

SCHOLARONE™  
Manuscripts

1  
2  
3  
4  
5  
6  
7  
8  
9  
10  
11  
12  
13  
14  
15  
16  
17  
18  
19  
20  
21  
22  
23  
24  
25  
26  
27  
28  
29  
30  
31  
32  
33  
34  
35  
36  
37  
38  
39  
40  
41  
42  
43  
44  
45  
46  
47  
48  
49  
50  
51  
52  
53  
54  
55  
56  
57  
58  
59  
60

## Article summary

### Article focus

The study was undertaken in order

1. to examine the association between delusional-like experiences (DLE), and (a) broadly defined anxiety disorders, and (b) major depressive disorders (MDD),
2. to explore the association between DLE and a range of specific anxiety disorders, and
3. to examine if severity of major depressive disorder influenced the risk of endorsement of DLE

### Key message

1. Having a lifetime diagnosis of either any anxiety disorder or major depressive disorders (MDD) was significantly associated with the endorsement of delusional-like experiences (DLE).
2. The association was found for each of the main anxiety disorders when examined separately.
3. There was a dose response relationship between increasing severity of MDD and higher odds of DLE endorsement

### Strengths and limitations

Strength:

1. The data were drawn from the nationally representative sample from the Australia general population

Limitation:

1. Cross-sectional study

1  
2  
3  
4  
5  
6  
7  
8  
9 *Abstract: 293 words*

10 *Main text: 1994 (excluding tables and references)*

11 *Tables 3*

12 *Appendices: 1*

13 *Key words: Delusional-like experiences, Anxiety disorders, Depressive disorders*

14  
15  
16 Anxiety and depressive disorders are associated with delusional-like  
17 experiences: a replication study based on a national mental health survey

18  
19  
20 Sukanta Saha\* <sup>1</sup>

21 James Scott <sup>1,2,3,4</sup>

22  
23 Daniel Varghese<sup>5</sup>

24  
25 John McGrath <sup>1,4,6</sup>

- 26  
27 1. Queensland Centre for Mental Health Research, The Park Centre for Mental  
28 Health, Wacol, QLD 4076, Australia
- 29 | 2. Metro North Mental Health, Royal Brisbane and Women's Hospital, Brisbane,  
30 QLD, Australia
- 31 | 3. The University of Queensland Centre for Clinical Research, Brisbane, QLD,  
32 Australia
- 33 | 4. Discipline of Psychiatry, University of Queensland, St Lucia, QLD, Australia
- 34 | 5. Princess Alexandra Hospital, Woolloongabba, QLD 4102, Australia
- 35 | 6. Queensland Brain Institute, University of Queensland, St Lucia, QLD, Australia
- 36  
37  
38  
39  
40  
41

Formatted: Space Before: 0.6 line, After: 0.6 line

Formatted: Space Before: 0.6 line, After: 0.6 line

42 **Corresponding author:**

43 Dr Sukanta Saha

44  
45 Queensland Centre for Mental Health Research,  
46 The Park Centre for Mental Health,  
47 Wacol, Queensland, 4076, Australia.  
48 sukanta\_saha@qcmhr.uq.edu.au  
49 Phone: +61 7 3271 8689  
50 Fax: +61 7 3271 8698  
51

## Abstract

### Objectives

There is growing evidence that delusional-like experiences (DLE) are associated with common mental disorders. In particular, a National Mental Health survey conducted in Australia during 2007 reported an association between DLE and both anxiety disorder and major depressive disorder (MDD). However, the previous study did not examine this association with respect to subtypes of anxiety disorder nor with severity of MDD. The aim of this study was to examine the associations between DLE and both anxiety disorder and MDD in more detail based on an independent population sample.

### Design

Cross-sectional study

### Setting

Subjects were drawn from the Australian Survey of Mental Health and Wellbeing 1997 using a stratified multistage area sampling of persons living in private dwellings in all States and Territories of Australia.

### Participants

Approximately 13,600 private dwellings were initially selected with one person aged 18 years or over from each dwelling invited to participate. In total, 10,641 individuals participated in the survey.

### Primary and secondary outcome measures

The Composite International Diagnostic Interview (CIDI) was used to identify individuals with DLE and DSM IV lifetime diagnoses of anxiety disorders and MDD. The influence of various anxiety disorders and MDD on DLE was assessed with logistic regression.

### Results

1  
2  
3  
4  
5  
6  
7  
8  
9 Having a lifetime diagnosis of either any anxiety disorder or MDD was significantly  
10 associated with the endorsement of DLE. The association was found for each of the  
11 main anxiety disorders when examined separately. There was a dose response  
12 relationship between increasing severity of MDD and higher odds of DLE endorsement.  
13  
14

### 15 **Conclusions**

16  
17 Delusional-like experiences are associated with a wide range of anxiety disorders and  
18 are more prevalent in those with MDD. Understanding the relationship between DLE,  
19 anxiety disorders and depression may provide insights into shared pathways that  
20 underpin both psychotic disorders and common mental disorders.  
21  
22  
23  
24  
25  
26  
27  
28  
29  
30  
31  
32  
33  
34  
35  
36  
37  
38  
39  
40  
41  
42  
43  
44  
45  
46  
47  
48  
49  
50  
51  
52  
53  
54  
55  
56  
57  
58  
59  
60

## INTRODUCTION

There is now robust evidence indicating that hallucinations and delusional-like experiences (DLE) are common in the general population. In recent years the field has focused on the demographic and clinical correlates of hallucinations and DLE.<sup>1-10</sup> Of particular interest, there is a growing body of evidence reporting an association between DLE endorsement and common mental disorders such as anxiety disorders and major depressive disorder (MDD). For example, panic attacks during adolescence were significantly associated with increased levels of DLE among young adults.<sup>11</sup> In the NEMESIS study, subjects with obsessive compulsive symptoms were more likely to develop incident psychotic symptoms three years later.<sup>12</sup> Conversely, a Swiss-based cohort reported that young adults with psychotic-like experiences were significantly more likely to later develop common mental disorders such as anxiety disorders and MDD.<sup>13</sup> A German community-based study found an association between social phobia, social anxiety and DLE,<sup>14</sup> while a US primary-care based sample reported that those who reported psychotic-like experiences were more likely to have generalized anxiety disorders and panic disorders.<sup>15</sup>

Trauma exposure with or without post-traumatic stress disorder has been associated with DLE.<sup>7</sup> Several Australian studies<sup>10,16</sup> have found significant associations between DLE, and broadly-defined anxiety disorders, however to date these studies did not report on subtypes of anxiety disorders. In light of the evidence linking DLE with a wide range of different types of anxiety disorders, the evidence suggests that DLE are nonspecifically associated with anxiety disorders.

1  
2  
3  
4  
5  
6  
7  
8  
9 With respect to depression, several studies have found that individuals with depression  
10 are significantly more likely to endorse DLE.<sup>9,10,16,17</sup> Studies also show that DLE  
11 requiring clinical care were progressively more likely to occur with greater levels of  
12 affective dysregulation (depressive symptoms and hypo-manic symptoms).<sup>18</sup>  
13  
14 Importantly, there was a significant association between severity of depressive  
15 symptoms and persistence of psychotic symptoms.  
16  
17  
18  
19

20  
21 While longitudinal studies are required to explore the temporal sequence between  
22 depression, anxiety and DLE, we had the opportunity to replicate our previous findings  
23 with respect to the cross-sectional association between DLE and (a) broadly defined  
24 anxiety disorders, and (b) MDD.<sup>10</sup> Based on our previous studies, we predicted that  
25 those with anxiety disorder or major depression disorder would be more likely to  
26 endorse DLE. In addition, we were able to explore the association between DLE and a  
27 range of specific anxiety disorders. Furthermore, we were able to examine if severity of  
28 major depressive disorder influenced the risk of endorsement of DLE – we predicted  
29 that those with more severe MDD would be more likely to endorse DLE compared to  
30 those with milder forms of MDD.  
31  
32  
33  
34  
35  
36  
37  
38  
39  
40  
41  
42  
43

## 44 **METHODS**

### 45 **Participants**

1  
2  
3  
4  
5  
6  
7  
8  
9 The data were drawn from the 1997 National Survey of Mental Health and Wellbeing  
10 conducted in Australia by the Australian Bureau of Statistics (ABS) from a  
11 representative sample (random stratified multistage area sampling) of persons living in  
12 private dwellings in all States and Territories of Australia. Details of the survey  
13 methodology were published elsewhere.<sup>19</sup> In brief, approximately 13,600 private  
14 dwellings were initially selected with one person aged 18 years or over from each  
15 dwelling invited to participate. In total, 10,641 individuals participated in the survey,  
16 representing a response rate of 78%. Interviews were carried out by trained interviewers  
17 from the ABS, a statutory body responsible for conducting such surveys using ethical  
18 protocols that include written informed consent.  
19  
20  
21  
22  
23  
24  
25  
26  
27  
28

### 29 **Assessment of delusional-like experiences and DSM-IV diagnoses**

30  
31  
32  
33 Mental disorders were assessed by a modified version of the Composite International  
34 Diagnostic Interview (CIDI)<sup>20</sup> which yielded diagnoses of DSM-IV disorders. Briefly,  
35 within the CIDI there are three items related to identifying individuals who may be  
36 psychotic (*G Items*: “screening items”). For those who endorsed the screen item, a  
37 follow-up item was used to further explore the delusional-like nature of the experiences  
38 (“probe items”). Full details of the screen and probe items are provided in Appendix 1.  
39 The items covered the following features of psychotic disorders: delusions of control,  
40 thought interference and passivity (Question 1 and 1a); delusions of reference or  
41 persecution (Question 2 and 2a); and grandiose delusions (Question 3 and 3a). There  
42 was no item to assess hallucinations.  
43  
44  
45  
46  
47  
48  
49  
50  
51  
52



1  
2  
3  
4  
5  
6  
7  
8  
9 Based on CIDI-derived DSM-IV criteria, we identified subjects who had lifetime  
10 diagnoses of: (a) an anxiety disorder, (b) major depressive disorder. Anxiety disorders  
11 included panic disorder with or without agoraphobia, social phobia, generalised anxiety  
12 disorder (GAD), obsessive compulsive disorder (OCD), and agoraphobia without panic  
13 disorder. For those with MDD, allocation to subtypes was based on the total number of  
14 particular 'depressive' symptoms with the duration of at least two weeks. Full details of  
15 the symptom list and related rules to deal with multiple episodes can be found in the full  
16 report.<sup>21</sup> In brief, mild MDD was characterised by the presence of at least four  
17 symptoms, moderate MDD with at least six symptoms, and severe MDD with at least  
18 eight symptoms. These subtypes of MDD were mutually exclusive.  
19  
20  
21  
22  
23  
24  
25  
26  
27  
28

29 To ascertain trauma exposure, the CIDI elicits responses from 10 questions pertaining  
30 to past exposure to traumatic events. Details of the trauma variables have been  
31 published previously by our group.<sup>7,8</sup> In keeping with our previous analyses<sup>1-10</sup>  
32 individuals who screened positively for schizophrenia (i.e. respondents who reported  
33 'Yes' to the item "*Had been told at any time by a psychiatrist that they had*  
34 *schizophrenia*") were excluded from the analyses (n=87) leaving a total of 10,554  
35 subjects for this study.  
36  
37  
38  
39  
40  
41  
42  
43

## 44 **Statistical analysis**

45  
46  
47 To examine the association between DLE and both anxiety disorders and MDD, logistic  
48 models were fitted to the data while adjusting for various confounding factors. Because  
49 sex and age are associated with DLE,<sup>9,10,22</sup> we included these as covariates in the main  
50  
51  
52  
53  
54  
55  
56  
57  
58  
59  
60

1  
2  
3  
4  
5  
6  
7  
8  
9  
10  
11  
12  
13  
14  
15  
16  
17  
18  
19  
20  
21  
22  
23  
24  
25  
26  
27  
28  
29  
30  
31  
32  
33  
34  
35  
36  
37  
38  
39  
40  
41  
42  
43  
44  
45  
46  
47  
48  
49  
50  
51  
52  
53  
54  
55  
56  
57  
58  
59  
60

analyses. In keeping with our previous studies, we included a range of CIDI-derived, potential confounding variables in Model 2. These include substance misuse,<sup>23</sup> marital status, and migrant status,<sup>24</sup> educational status, employment status and family income, and trauma exposure.<sup>2,6-8</sup> As co-morbidity frequently occurs between anxiety disorders and MDD, we also adjusted for the presence of the other psychiatric diagnoses under investigation (i.e. the association between MDD and DLE was adjusted for the presence of anxiety disorders, and the association between anxiety disorders and DLE was adjusted for the presence of Major Depressive Disorder).

For secondary analyses (a sensitivity analysis), we repeated the main analyses excluding the second screen items (“Have you ever had a feeling that people were too interested in you?”) because clinical experience suggests that this is a common experience in social anxiety.

The sample was weighted to adjust for differential probabilities of selection within households, over-sampling of population subgroups and non-response to match census population distribution on a number of geographic and socio-demographic variables. The initial weights were calibrated against known population estimates. Replicate weight variables were developed using the Jack-knife procedure of replication (i.e., the analysis was repeated after one subject was dropped and then the standard error was derived from the distribution of results from all “minus one” resamples).<sup>25</sup> Analyses were performed using Proc *Surveylogistic*<sup>26</sup> which is designed to analyse complex survey sample using SAS (version 9.3; Cary, NC: SAS Institute). Chi-square test-for-

1  
2  
3  
4  
5  
6  
7  
8  
9 linear trend was used to assess dose-response relationships between the exposure  
10 variables and DLE.  
11

## 12 13 14 **RESULTS**

15  
16  
17  
18 Of the 10 554 subjects surveyed, 11.6% (n=1276) positively endorsed one or more DLE  
19 items (Table 1). There was a weak effect of females being more likely to endorse DLE  
20 than males (Odd Ratio (OR) 1.05; 95% Confidence Intervals (CI) 1.04-1.05). The  
21 prevalence of lifetime diagnosis of any anxiety disorder was 4.9% (n=580), and the  
22 prevalence of lifetime depressive disorders was 5.3% (n=651).  
23  
24  
25  
26  
27

28  
29  
30 Insert Table 1 about here  
31

32  
33  
34 As predicted, the main analyses showed that those with any anxiety disorder and  
35 participants who had lifetime diagnosis of MDD were significantly more likely to endorse  
36 delusional-like experiences. Those with anxiety disorders were two to three times more  
37 likely to endorse both DLE screen and probe items (Table 2), and those with a  
38 diagnosis of major depressive disorder were also two to three times more likely to  
39 endorse DLE screen and probe items.  
40  
41  
42  
43  
44  
45

46  
47  
48 Insert Table 2 about here  
49

1  
2  
3  
4  
5  
6  
7  
8  
9  
10  
11  
12  
13  
14  
15  
16  
17  
18  
19  
20  
21  
22  
23  
24  
25  
26  
27  
28  
29  
30  
31  
32  
33  
34  
35  
36  
37  
38  
39  
40  
41  
42  
43  
44  
45  
46  
47  
48  
49  
50  
51  
52  
53  
54  
55  
56  
57  
58  
59  
60

Concerning the subtypes of anxiety disorders, each disorder was significantly associated with DLE screen items, and there were no marked differences in the effect sizes between the different disorders (Table 3). There was a dose response relationship between the severity of the MDD and DLE in which severe depression showed twice the odds of endorsement of DLE screen items compared with a diagnosis of mild major depressive disorder with a significant linear trend ( $\chi^2=44.19$ ,  $p<.0001$ ). Broadly similar (but less precise) associations were also found for probe items.

Insert Table 3 about here

In the secondary analysis, when we conducted the models using two DLE items (G1 & G3), the pattern of significant association for major anxiety and depressive disorders remained unchanged (data not shown).

## DISCUSSION

Individuals with a lifetime diagnosis of major depressive disorder or an anxiety disorder were significantly more likely to report DLE compared to those without these disorders.

We found that each subtype of anxiety disorder was associated with DLE, and there were no marked differences in the effect sizes for these associations (the confidence intervals around these associations overlapped). Based on this same sample, we have previously demonstrated that trauma exposure without Post-traumatic Stress Disorder

1  
2  
3  
4  
5  
6  
7  
8  
9 was associated with DLE.<sup>7</sup> Our new findings add additional weight to the conclusion that  
10 a range of disorders with prominent anxiety symptoms are associated with DLE.  
11

12  
13  
14 As predicted, there was also a dose response relationship between severity of MDD  
15 and DLE. All associations remained significant when adjusted for associated co-  
16 morbidity with anxiety, alcohol and illicit substance misuse and any traumatic life events  
17 indicating that the associations are independent of co-morbid psychiatric illnesses, and  
18 selected environmental and demographic risk factors.  
19

20  
21  
22 The mechanisms linking DLE with anxiety disorder and MDD remain unclear. However,  
23 there is evidence to suggest that shared familial factors may contribute to these  
24 findings.<sup>9</sup>  
25

26  
27  
28 In the current study we were not able to examine the temporal sequence between the  
29 variables of interest – for example, we do not know if anxiety or depressive symptoms  
30 preceded the onset of DLE or vice versa. Unfortunately, the delusional like experience  
31 have no information about age of onset nor presence during the last twelve months.  
32  
33 Thus, while the CIDI has some information about the age of onset and the presence of  
34 the disorder in the past year, the lack of comparable data for the DLE compromises out  
35 ability to infer temporal sequence. Longitudinal studies will be required to explore this  
36 particular research question. The reliance on life-time measures of both DLE and  
37 mental disorders is also problematic, as it is known that respondents tend to under-  
38 report true lifetime prevalence estimates.<sup>27</sup> While the interviewers were trained, the  
39 diagnoses of MDD and anxiety disorders were not validated by clinical assessment.  
40  
41  
42  
43  
44  
45  
46  
47  
48  
49  
50  
51  
52

1  
2  
3  
4  
5  
6  
7  
8  
9 However, the CIDI is generally regarded as having good psychometric properties for  
10 common mental disorders.<sup>28</sup> Comorbidity between anxiety disorders and MDD is  
11 common, and while we included adjustments in the our models to attempt to account for  
12 this feature, the complex nature of the relationships between DLE, MDD and anxiety  
13 disorders could reduce the accuracy of the odds ratios.<sup>29</sup> We had a small number of  
14 screen and probe items to measure delusional-like experiences and there were no  
15 items for hallucinations. However, previous general population studies have found a  
16 strong association between the presence of DLE and hallucinations.<sup>24,30-32</sup>  
17  
18  
19  
20  
21  
22  
23  
24

25  
26 There is now robust and consistent evidence indicating that those with anxiety disorders  
27 and MDD have an increased risk of DLE. For example, clinicians involved in the care of  
28 those with primary diagnoses of anxiety disorder or depression may not routinely  
29 enquire about DLE. In light of the association between DLE and suicidal  
30 ideation/behaviour,<sup>3</sup> the presence of these experiences may suggest that clinical care  
31 plans place greater emphasis on the detection and management of suicidal ideation. A  
32 recent study based on adolescents found that most individuals (57 to 80% depending  
33 on age) who reported psychotic-like experiences (e.g. hallucinations and/or DLE), had  
34 at least one diagnosable non-psychotic psychiatric disorder.<sup>33</sup> We agree with these  
35 authors, who note that psychotic symptoms appear to be important risk markers for a  
36 wide range of non-psychotic mental health disorders.  
37  
38  
39  
40  
41  
42  
43  
44  
45  
46  
47

48 **Competing interest** None  
49  
50  
51  
52  
53  
54  
55  
56  
57  
58  
59  
60

1  
2  
3  
4  
5  
6  
7  
8  
9 **Funding** This research received no specific grant from any funding agency in the  
10 public, commercial or not-for-profit sectors.  
11

12  
13 **Contributors** JM, SS and JS have directly participated in the planning and execution  
14 of the study. SS analysed the data. All authors have critically read, and approved the  
15 final version submitted.  
16  
17

18  
19 **Provenance and peer review** Not commissioned; externally peer reviewed  
20  
21

22  
23 **Data sharing statement** The data are available from the Australian Bureau of  
24 Statistics  
25  
26  
27  
28  
29  
30  
31  
32  
33  
34  
35  
36  
37  
38  
39  
40  
41  
42  
43  
44  
45  
46  
47  
48  
49  
50  
51  
52  
53  
54  
55  
56  
57  
58  
59  
60

## References

1. Saha S, Scott J, Varghese D, et al. The association between physical health and delusional-like experiences: a general population study. *PLoS One* 2011; 6: e18566.
2. Saha S, Scott J, Varghese D, et al. The association between socio-economic disadvantage and delusion-like experiences: a nationwide population-based study. *European Psychiatry* 2011; doi: 10.1016/j.eurpsy.2011.09.004 (Epub ahead of print).
3. Saha S, Scott JG, Johnston AK, et al. The association between delusional-like experiences and suicidal thoughts and behaviour. *Schizophr Res* 2011; 132: 197-202.
4. Saha S, Scott JG, Varghese D, et al. The association between delusional-like experiences, and tobacco, alcohol or cannabis use: a nationwide population-based survey. *BMC Psychiatry* 2011; 11: 202.
5. Saha S, Scott JG, Varghese D, et al. The association between general psychological distress and delusional-like experiences: a large population-based study. *Schizophr Res* 2011; 127: 246-251.
6. Saha S, Varghese D, Slade T, et al. The association between trauma and delusional-like experiences. *Psychiatry Res* 2011; 189: 259-264.
7. Scott J, Chant D, Andrews G, et al. Association between trauma exposure and delusional experiences in a large community-based sample. *Br J Psychiatry* 2007; 190: 339-343.



- 1  
2  
3  
4  
5  
6  
7  
8  
9 8. Scott J, Chant D, Andrews G, et al. Psychotic-like experiences in the general  
10 community: the correlates of CID-I psychosis screen items in an Australian  
11 sample. *Psychol Med* 2006; 36: 231-238.  
12  
13  
14 9. Varghese D, Saha S, Scott JD, et al. The association between family history of  
15 mental disorder and delusional-like experiences: a general population study. *Am*  
16 *J Med Genet B Neuropsychiatr Genet* 2011; 156B: 478-483.  
17  
18  
19 10. Varghese D, Scott J, Welham J, et al. Psychotic-like experiences in major  
20 depression and anxiety disorders: a population-based survey in young adults.  
21 *Schizophr Bull* 2011; 37: 389-393.  
22  
23  
24 11. Goodwin RD, Fergusson DM, Horwood LJ. Panic attacks and psychoticism. *Am J*  
25 *Psychiatry* 2004; 161: 88-92.  
26  
27  
28 12. van Dael F, van Os J, de Graaf R, et al. Can obsessions drive you mad?  
29 Longitudinal evidence that obsessive-compulsive symptoms worsen the outcome  
30 of early psychotic experiences. *Acta Psychiatr Scand* 2011; 123: 136-146.  
31  
32  
33 13. Rossler W, Hengartner MP, Ajdacic-Gross V, et al. Sub-clinical psychosis symptoms  
34 in young adults are risk factors for subsequent common mental disorders.  
35 *Schizophr Res* 2011; 131: 18-23.  
36  
37  
38 14. Schutters SI, Dominguez MD, Knappe S, et al. The association between social  
39 phobia, social anxiety cognitions and paranoid symptoms. *Acta Psychiatr Scand*  
40 2011.  
41  
42  
43 15. Olsson M, Lewis-Fernandez R, Weissman MM, et al. Psychotic symptoms in an  
44 urban general medicine practice. *Am J Psychiatry* 2002; 159: 1412-1419.  
45  
46  
47  
48  
49  
50  
51  
52  
53  
54  
55  
56  
57  
58  
59  
60

1  
2  
3  
4  
5  
6  
7  
8  
9  
10  
11  
12  
13  
14  
15  
16  
17  
18  
19  
20  
21  
22  
23  
24  
25  
26  
27  
28  
29  
30  
31  
32  
33  
34  
35  
36  
37  
38  
39  
40  
41  
42  
43  
44  
45  
46  
47  
48  
49  
50  
51  
52  
53  
54  
55  
56  
57  
58  
59  
60

16. Yung AR, Buckby JA, Cosgrave EM, et al. Association between psychotic experiences and depression in a clinical sample over 6 months. *Schizophr Res* 2007; 91: 246-253.
17. Armando M, Nelson B, Yung AR, et al. Psychotic-like experiences and correlation with distress and depressive symptoms in a community sample of adolescents and young adults. *Schizophr Res* 2010; 119: 258-265.
18. van Rossum I, Dominguez MG, Lieb R, et al. Affective dysregulation and relativity distortion: a 10-year prospective study of their association and clinical relevance. *Schizophr Bull* 2011; 37: 561-571.
19. Andrews G, Henderson S, Hall W. Prevalence, comorbidity, disability and service utilisation. Overview of the Australian National Mental Health Survey. *Br J Psychiatry* 2001; 178: 145-153.
20. WHO. Composite International Diagnostic Interview- Version 1.1: World Health Organisation: Geneva 1993.
21. Australian Bureau of Statistics. National Survey of Mental Health and Wellbeing: summary of results, 2007 (Explanatory notes). Cat No. 4326.0; Australian Bureau of Statistics C, editor: Australian Bureau of Statistics: Canberra 2008.
22. Varghese D, Scott J, McGrath J. Correlates of delusion-like experiences in a non-psychotic community sample. *Aust N Z J Psychiatry* 2008; 42: 505-508.
23. Degenhardt L, Hall W. The association between psychosis and problematical drug use among Australian adults: findings from the National Survey of Mental Health and Well-Being. *Psychological Medicine* 2001; 31: 659-668.

- 1  
2  
3  
4  
5  
6  
7  
8  
9 24. Scott J, Welham J, Martin G, et al. Demographic correlates of psychotic-like  
10 experiences in young Australian adults. *Acta Psychiatr Scand* 2008; 118: 230-  
11 237.  
12  
13  
14 25. Rust KF, Rao JN. Variance estimation for complex surveys using replication  
15 techniques. *Stat Methods Med Res* 1996; 5: 283-310.  
16  
17  
18 26. An AB Performing logistic regression on survey data with the new  
19 SURVEYLOGISTIC procedure. Proceedings of the Twenty-Seven Annual SAS  
20 Users Group International Conference. Paper 258 ed:  
21 <http://www2.sas.com/proceedings/sugi27/p258-27.pdf>. 2004.  
22  
23  
24 27. Moffitt TE, Caspi A, Taylor A, et al. How common are common mental disorders?  
25 Evidence that lifetime prevalence rates are doubled by prospective versus  
26 retrospective ascertainment. *Psychol Med* 2010; 40: 899-909.  
27  
28  
29 28. Andrews G, Peters L. The psychometric properties of the Composite International  
30 Diagnostic Interview. *Soc Psychiatry Psychiatr Epidemiol* 1998; 33: 80-88.  
31  
32  
33 29. Hernan MA, Hernandez-Diaz S, Werler MM, et al. Causal knowledge as a  
34 prerequisite for confounding evaluation: an application to birth defects  
35 epidemiology. *Am J Epidemiol* 2002; 155: 176-184.  
36  
37  
38 30. Hanssen MS, Bijl RV, Vollebergh W, et al. Self-reported psychotic experiences in  
39 the general population: a valid screening tool for DSM-III-R psychotic disorders?  
40 *Acta Psychiatr Scand* 2003; 107: 369-377.  
41  
42  
43 31. Lincoln TM, Peter N, Schafer M, et al. Impact of stress on paranoia: an experimental  
44 investigation of moderators and mediators. *Psychol Med* 2008: 1-11.  
45  
46  
47  
48  
49  
50  
51  
52  
53  
54  
55  
56  
57  
58  
59  
60

1  
2  
3  
4  
5  
6  
7  
8  
9  
10  
11  
12  
13  
14  
15  
16  
17  
18  
19  
20  
21  
22  
23  
24  
25  
26  
27  
28  
29  
30  
31  
32  
33  
34  
35  
36  
37  
38  
39  
40  
41  
42  
43  
44  
45  
46  
47  
48  
49  
50  
51  
52  
53  
54  
55  
56  
57  
58  
59  
60

32. Scott J, Martin G, Welham J, et al. Psychopathology during childhood and adolescence predicts delusional-like experiences in adults: a 21-year birth cohort study. *Am J Psychiatry* 2009; 166: 567-574.

33. Kelleher I, Keeley H, Corcoran P, et al. Clinicopathological significance of psychotic experiences in non-psychotic young people: evidence from four population-based studies. *Br J Psychiatry* 2012.

**Table 1. Descriptive statistics of delusional-like experiences (Screen items), anxiety disorder and major depressive disorder (n=10,554)**

| Exposure                                             | Sample<br>n (%) | Delusional-like experiences endorsement |              |
|------------------------------------------------------|-----------------|-----------------------------------------|--------------|
|                                                      |                 | No (%)                                  | Yes (%)      |
| Total sample                                         | 10,554 (100.00) | 9278 (88.44)                            | 1276 (11.56) |
| Anxiety and depressive disorders                     |                 |                                         |              |
| No Anxiety disorders                                 | 9974 (95.13)    | 8900 (85.16)                            | 1074 (9.97)  |
| <sup>1</sup> Any Anxiety disorders: lifetime         | 580 (4.87)      | 378 (4.29)                              | 202 (16.88)  |
| No Major depressive disorder                         |                 |                                         |              |
| No Major depressive disorder                         | 9903 (94.66)    | 8834 (84.76)                            | 1069 (9.89)  |
| <sup>2</sup> Any Major depressive disorder: lifetime | 651 (5.34)      | 444 (4.77)                              | 207 (16.78)  |

<sup>1</sup>Anxiety disorders based on CIDI DSM diagnosis

<sup>2</sup>Major depressive disorder based on CIDI DSM diagnosis

**Table 2. Association between delusional-like experiences, and anxiety disorders and major depressive disorder (n=10,554)**

| Disorders                                        | Delusional-like experiences                                    |                                                                |                                                                |                                                                |
|--------------------------------------------------|----------------------------------------------------------------|----------------------------------------------------------------|----------------------------------------------------------------|----------------------------------------------------------------|
|                                                  | Screen items                                                   |                                                                | Probe items                                                    |                                                                |
|                                                  | Model 1 <sup>1</sup><br>OR <sup>3</sup> (95% CI <sup>4</sup> ) | Model 2 <sup>2</sup><br>OR <sup>3</sup> (95% CI <sup>4</sup> ) | Model 1 <sup>1</sup><br>OR <sup>3</sup> (95% CI <sup>4</sup> ) | Model 2 <sup>2</sup><br>OR <sup>3</sup> (95% CI <sup>4</sup> ) |
| Anxiety disorders: lifetime <sup>@</sup>         | 3.88<br>(2.92, 5.16)*                                          | 2.43<br>(1.91, 3.09)*                                          | 3.36<br>(1.86, 6.05)*                                          | 2.12<br>(1.27, 3.54)*                                          |
| Major depressive disorder: Lifetime <sup>#</sup> | 3.63<br>(2.75, 4.79)*                                          | 2.17<br>(1.65, 2.86)*                                          | 2.91<br>(1.84, 4.59)*                                          | 1.63<br>(1.10, 2.42)*                                          |

<sup>1</sup>Model 1= Adjusted for age and sex

<sup>2</sup>Model 2= Adjusted for age, sex, marital status, migrant status, income, employment status, educational status, any alcohol use/dependence disorders, any drug use/dependence disorders, and any traumatic life events  
(in Model 2 anxiety disorders were adjusted for major depressive disorder and vice versa)

<sup>@#</sup>Anxiety and depressive disorders were based on CIDI DSM diagnosis

<sup>3</sup>OR=Odds ratio; <sup>4</sup>CI= Confidence Interval

\*significance:  $p < 0.001$

**Table 3. Association between delusional-like experiences, and different individual exposure to lifetime anxiety disorders, and major depressive disorder (n=10,554)**

|                                         | Delusional-like experiences |                                        |                                        |                                        |                                        |
|-----------------------------------------|-----------------------------|----------------------------------------|----------------------------------------|----------------------------------------|----------------------------------------|
|                                         |                             | Screen items                           | Probe items                            |                                        |                                        |
|                                         | Number                      | Model 1 <sup>2</sup>                   | Model 2 <sup>3</sup>                   | Model 1 <sup>2</sup>                   | Model 2 <sup>3</sup>                   |
|                                         | (%, SE <sup>1</sup> )       | OR <sup>4</sup> (95% CI <sup>5</sup> ) | OR <sup>4</sup> (95% CI <sup>5</sup> ) | OR <sup>4</sup> (95% CI <sup>5</sup> ) | OR <sup>4</sup> (95% CI <sup>5</sup> ) |
| <b>Anxiety disorders</b>                |                             |                                        |                                        |                                        |                                        |
| Panic disorder with/without agoraphobia | 124 (1.02, 0.12)            | <b>4.56 (2.51, 8.33)*</b>              | <b>2.40 (1.03, 5.63)*</b>              | <b>2.55 (1.13, 5.78)*</b>              | 1.54 (0.77, 3.08)                      |
| General anxiety                         | 311 (2.57, 0.23)            | <b>3.69 (2.57, 5.29)*</b>              | <b>2.09 (1.50, 2.93)*</b>              | <b>3.05 (1.41, 6.58)*</b>              | 1.77 (0.89, 3.51)                      |
| Obsessive compulsive disorder           | 77 (0.69, 0.12)             | <b>5.19 (2.69, 10.03)*</b>             | <b>2.97 (1.50, 5.88)*</b>              | <b>4.60 (1.81, 11.74)*</b>             | <b>2.68 (1.05, 6.84)*</b>              |
| Agoraphobia without panic disorder      | 60 (0.49, 0.06)             | <b>5.18 (2.72, 9.85)*</b>              | <b>3.49 (1.95, 6.28)*</b>              | <b>7.02 (3.73, 13.19)*</b>             | <b>4.65 (1.98, 10.89)*</b>             |
| Social phobia                           | 160 (1.35, 0.14)            | <b>4.14 (2.81, 6.11)*</b>              | <b>2.29 (1.63, 3.24)*</b>              | <b>4.15 (1.93, 8.91)*</b>              | <b>2.39 (1.06, 5.43)*</b>              |
| <b>Major Depressive disorder</b>        |                             |                                        |                                        |                                        |                                        |
| Mild                                    | 297 (2.52, 0.20)            | <b>2.96 (1.82, 4.82)*</b>              | <b>1.97 (1.15, 3.37)*</b>              | <b>2.37 (1.39, 4.04)*</b>              | 1.49 (0.88, 2.53)                      |
| Moderate                                | 190 (1.52, 0.14)            | <b>3.29 (1.81, 6.01)*</b>              | 1.89 (0.98, 3.70)                      | <b>2.73 (1.27, 5.84)*</b>              | 1.53 (0.79, 2.96)                      |
| Severe                                  | 164 (1.29, 0.12)            | <b>5.73 (3.96, 8.30)*</b>              | <b>3.03 (2.11, 4.35)*</b>              | <b>4.25 (2.01, 8.99)*</b>              | <b>1.99 (1.02, 3.91)*</b>              |
| <i>Trend</i>                            |                             | $\chi^2=111.83, p<.0001$               | $\chi^2=44.19, p<.0001$                | $\chi^2=21.19, p<.0001$                | $\chi^2=6.04, p<.001$                  |

<sup>1</sup>SE= Standard error of estimates; <sup>2</sup>Model 1= Adjusted for age and sex; <sup>3</sup>Model 2= Adjusted for age, sex, marital status, migrant status, income, employment status, educational status, any alcohol use/dependence disorders, any drug use/dependence disorders, and any traumatic life events (in Model 2 anxiety disorders were adjusted for major depressive disorder and vice versa)

<sup>4</sup>OR=Odds Ratio; <sup>5</sup>CI= Confidence Interval; \*significance:  $p<0.001$

## Appendix 1 CIDI Screen items and Probes for delusional-like experiences<sup>1</sup> (n=10,554<sup>2</sup>)

---

### Item G1:

In the past 12 months, have you felt that your thoughts were being directly interfered with or controlled by another person?

*If yes, G1A:*

*Did it come about in a way that many people would find hard to believe, for instance, through telepathy?*

### Item G2:

In the past 12 months, have you had a feeling that people were too interested in you?

*If yes, G2A:*

*In the past 12 months, have you had a feeling that things were arranged so as to have a special meaning for you, or even that harm might come to you?*

### Item G3:

Do you have any special powers that most people lack?

*If yes, G3A:*

*Do you belong to a group of people who also have these powers?*

### Item G4:

Has a doctor ever told you that you may have schizophrenia?

---

<sup>1</sup>Screen items (lifetime) with answer (Yes/No): 'Any screen' items required 'Yes' answers to all three questions G1, G2 & G3.

#Probe items (lifetime) with answer (Yes/No): 'Any probe' items required 'Yes' answers to G1A and G2A, and 'No' answer to G3A.

<sup>2</sup>sample excludes item G4 (*Has a doctor ever told you that you may have schizophrenia?*) (n=87)
